# Supplementary material
Source: PubMed Central journal article supplement (PMC3113343)
Supplement: mmc1.pdf [file mmc1.pdf]

**Supplemental Data**

**American Journal of Human Genetics, Volume 88**

## **DASH: A Method for Identical by Descent-Based Haplotype**

### **Discovery Uncovers Association to Recent Variation**

**Alexander Gusev, Eimear E. Kenny, Jennifer K. Lowe, Jaqueline Salit, Richa Saxena, Sekar Kathiresan, David M. Altshuler, Jeffrey M. Friedman, Jan L. Breslow, and Itsik Pe'er**

**Table S1. Data Set Summary**

|                                                 | <b>Kosrae</b>        | <b>WTCCC</b>         |
|-------------------------------------------------|----------------------|----------------------|
| Total samples                                   | 2,906                | 16,179               |
| Total polymorphic variants                      | 398,876              | 451,490              |
| Hidden variants                                 | 121,633              | 93,896               |
| <i>in reference panel</i>                       | 98,488               | 75,845               |
| Simulated causal variants                       | 12,500               | 12,500               |
| <i>in reference panel</i>                       | 10,380               | 10,333               |
| Total tested variants                           | 277,243              | 357,594              |
| Genome-wide significance threshold (DASH)       | $4.0 \times 10^{-8}$ | $5.4 \times 10^{-8}$ |
| Genome-wide significance threshold (GWAS)       | $2.5 \times 10^{-7}$ | $2.0 \times 10^{-7}$ |
| Genome-wide significance threshold (imputation) | $2.1 \times 10^{-7}$ | $9.3 \times 10^{-8}$ |

**Table S2. All Genome-Wide Significant Regions Identified in the WTCCC**

| Trait      | Chr      | Haplotype start   | Haplotype end     | <i>f</i>    | OR          | <i>P</i> DASH <sup>1</sup> | Controls only <i>P</i> GWAS <sup>2</sup> | Pooled controls <i>P</i> GWAS <sup>3</sup> | conditioned <i>P</i> DASH <sup>4</sup> | stepwise conditioned <i>P</i> DASH <sup>5</sup> | Published relevant associations | <i>r</i> <sup>2</sup> in 0.95 calls <sup>6</sup> | <i>r</i> <sup>2</sup> in 0.98 calls <sup>7</sup> |
|------------|----------|-------------------|-------------------|-------------|-------------|----------------------------|------------------------------------------|--------------------------------------------|----------------------------------------|-------------------------------------------------|---------------------------------|--------------------------------------------------|--------------------------------------------------|
| CAD        | 6        | 160,730,710       | 160,927,528       | 1.3%        | 2.13        | 8.2E-11                    | 1.4E-04                                  | 5.9E-05                                    | 2.3E-06                                | 2.3E-10                                         | <i>SLC22A3,LPAL2,LPA</i>        | 0.98                                             | 0.97                                             |
| CAD        | 6        | 160,927,528       | 160,930,756       | 1.2%        | 2.05        | 3.4E-09                    | 1.4E-04                                  | 5.9E-05                                    | 1.4E-06                                | 7.1E-09                                         | <i>SLC22A3,LPAL2,LPA</i>        | <u>0.64</u>                                      | <u>0.64</u>                                      |
| CAD        | 9        | 22,062,730        | 22,227,321        | 34.9%       | 0.78        | 1.4E-11                    | 7.7E-15                                  | 2.9E-17                                    | <i>NS</i>                              | <i>NS</i>                                       | <i>CDKN2A</i>                   | 0.90                                             | 0.90                                             |
| CD         | 1        | 67,374,727        | 67,523,062        | 14.8%       | 1.38        | 5.1E-12                    | 5.0E-19                                  | 1.2E-24                                    | <i>NS</i>                              | <i>NS</i>                                       | <i>IL23R</i>                    | 0.94                                             | 0.88                                             |
| CD         | 5        | 131,829,846       | 131,844,802       | 37.7%       | 1.29        | 4.2E-12                    | 8.1E-08                                  | 8.2E-12                                    | <i>NS</i>                              | <i>NS</i>                                       | 5q31 region                     | 0.89                                             | 0.88                                             |
| CD         | 16       | 49,152,847        | 49,164,501        | 3.7%        | 1.95        | 9.9E-19                    | 9.9E-16                                  | 7.5E-19                                    | 1.4E-08                                | 1.4E-08                                         | <i>NKD1</i>                     | 0.89                                             | <u>0.28</u>                                      |
| CD         | 16       | 49,477,102        | 49,477,284        | 1.6%        | 2.10        | 5.3E-12                    | 9.9E-16                                  | 7.5E-19                                    | 5.1E-07                                | 5.1E-07                                         | <i>NOD2</i>                     | 0.96                                             | 0.95                                             |
| RA         | 6        | 33,903,649        | 33,907,610        | 1.1%        | 2.18        | 1.4E-09                    | 2.7E-42                                  | 9.4E-64                                    | 4.1E-07                                | 1.2E-05                                         | MHC                             | <u>0.64</u>                                      | <u>0.11</u>                                      |
| T1D        | 6        | 28,110,942        | 28,119,631        | 0.8%        | 3.57        | 1.5E-23                    | 4.2E-144                                 | 4.9E-175                                   | 2.1E-04                                | 1.5E-04                                         | MHC                             | 0.99                                             | 0.99                                             |
| T1D        | 6        | 28,476,919        | 28,478,225        | 12.1%       | 1.61        | 4.1E-25                    | 4.2E-144                                 | 4.9E-175                                   | 2.1E-02                                | 1.4E-02                                         | MHC                             | <u>0.77</u>                                      | <u>0.77</u>                                      |
| <b>T1D</b> | <b>6</b> | <b>33,787,785</b> | <b>33,790,392</b> | <b>0.6%</b> | <b>3.94</b> | <b>4.2E-24</b>             | <b>4.2E-144</b>                          | <b>4.9E-175</b>                            | <b>2.7E-13</b>                         | <b>1.0E-07</b>                                  | <b>MHC</b>                      | <b>0.99</b>                                      | <b>0.99</b>                                      |

Haplotypes also shown in Table 1 are marked in bold

<sup>1</sup>Strongest association in locus, conditionally independent of all genome-wide significant and local haplotypes on chromosome

<sup>2</sup>Most significant nearby single marker association with NBS & 58C controls only

<sup>3</sup>Most significant nearby single marker association with combined alternative cases and controls

<sup>4</sup>Least significant haplotype association after conditioning on any nearby single markers (combined cases and controls)

<sup>5</sup>Haplotype association after conditioning on all independently genome-wide significant single markers (combined case and controls)

<sup>6</sup>Strongest correlation (*r*<sup>2</sup>) to a haplotype identified in a subset of markers with at least 98% of samples having genotype call confidence of 0.95

<sup>7</sup>Strongest correlation (*r*<sup>2</sup>) to a haplotype identified in a subset of markers with at least 98% of samples having genotype call confidence of 0.98

**Table S3. All Genome-Wide Significant, Localized Regions Identified in the WTCCC**

| Trait      | Chr       | Haplotype start    | Haplotype end      | <i>f</i>    | OR          | <i>P</i> DASH <sup>1</sup> | Controls only <i>P</i> GWAS <sup>2</sup> | Pooled controls <i>P</i> GWAS <sup>3</sup> | conditioned <i>P</i> DASH <sup>4</sup> | stepwise conditioned <i>P</i> DASH <sup>5</sup> | Published relevant associations | <i>r</i> <sup>2</sup> in 0.95 calls <sup>6</sup> | <i>r</i> <sup>2</sup> in 0.98 calls <sup>7</sup> |
|------------|-----------|--------------------|--------------------|-------------|-------------|----------------------------|------------------------------------------|--------------------------------------------|----------------------------------------|-------------------------------------------------|---------------------------------|--------------------------------------------------|--------------------------------------------------|
| <b>CAD</b> | <b>6</b>  | <b>160,932,260</b> | <b>161,017,268</b> | <b>1.7%</b> | <b>2.17</b> | <b>4.1E-14</b>             | <b>1.4E-04</b>                           | <b>5.9E-05</b>                             | <b>2.6E-09</b>                         | <b>4.1E-14</b>                                  | <b><i>SLC22A3,LPAL2,LPA</i></b> | <b>1.00</b>                                      | <b>1.00</b>                                      |
| CAD        | 9         | 22,021,005         | 22,109,128         | 35.8%       | 1.30        | 4.1E-14                    | 7.7E-15                                  | 2.9E-17                                    | NS                                     | NS                                              | <i>CDKN2A</i>                   | 1.00                                             | 0.99                                             |
| CD         | 1         | 67,283,445         | 67,348,663         | 4.5%        | 0.39        | 8.0E-15                    | 5.0E-19                                  | 1.2E-24                                    | 5.7E-04                                | 1.2E-03                                         | <i>IL23R</i>                    | 0.99                                             | 0.99                                             |
| CD         | 1         | 67,424,321         | 67,478,314         | 25.3%       | 1.43        | 1.9E-20                    | 5.0E-19                                  | 1.2E-24                                    | NS                                     | NS                                              | <i>IL23R</i>                    | 0.99                                             | 0.99                                             |
| CD         | 5         | 131,703,880        | 131,782,903        | 42.2%       | 1.29        | 6.8E-13                    | 8.1E-08                                  | 8.2E-12                                    | 4.6E-02                                | 4.6E-02                                         | 5q31 region                     | 0.97                                             | 0.93                                             |
| <b>CD</b>  | <b>16</b> | <b>49,244,058</b>  | <b>49,244,516</b>  | <b>7.2%</b> | <b>1.80</b> | <b>1.7E-24</b>             | <b>9.9E-16</b>                           | <b>7.5E-19</b>                             | <b>3.0E-10</b>                         | <b>3.0E-10</b>                                  | <b><i>NKD1</i></b>              | <b>0.98</b>                                      | <b>0.98</b>                                      |
| <b>RA</b>  | <b>6</b>  | <b>33,512,042</b>  | <b>33,684,663</b>  | <b>2.4%</b> | <b>2.35</b> | <b>1.0E-23</b>             | <b>2.7E-42</b>                           | <b>9.4E-64</b>                             | <b>1.8E-16</b>                         | <b>3.3E-13</b>                                  | <b><i>MHC</i></b>               | <b>1.00</b>                                      | <b>1.00</b>                                      |
| T1D        | 6         | 26,507,565         | 26,509,417         | 12.4%       | 1.43        | 4.0E-14                    | 4.2E-144                                 | 4.9E-175                                   | NS                                     | 1.6E-02                                         | <i>MHC</i>                      | 0.99                                             | 0.99                                             |
| T1D        | 6         | 26,622,750         | 26,636,229         | 0.6%        | 3.78        | 1.1E-21                    | 4.2E-144                                 | 4.9E-175                                   | 1.6E-03                                | 1.8E-05                                         | <i>MHC</i>                      | 1.00                                             | 1.00                                             |
| <b>T2D</b> | <b>11</b> | <b>22,429,718</b>  | <b>22,483,326</b>  | <b>0.3%</b> | <b>3.79</b> | <b>1.9E-10</b>             | <b>2.8E-03</b>                           | <b>3.1E-03</b>                             | <b>4.3E-08</b>                         | <b>1.9E-10</b>                                  | <b>-</b>                        | <b>0.99</b>                                      | <b>0.99</b>                                      |

\*Haplotypes also shown in Table 1 are marked in bold

<sup>1</sup>Strongest association in locus, conditionally independent of all genome-wide significant and local haplotypes on chromosome

<sup>2</sup>Most significant nearby single marker association with NBS & 58C controls only

<sup>3</sup>Most significant nearby single marker association with combined alternative cases and controls

<sup>4</sup>Least significant haplotype association after conditioning on any nearby single markers (combined cases and controls)

<sup>5</sup>Haplotype association after conditioning on all independently genome-wide significant single markers (combined case and controls)

<sup>6</sup>Strongest correlation (*r*<sup>2</sup>) to a haplotype identified in a subset of markers with at least 98% of samples having genotype call confidence of 0.95

<sup>7</sup>Strongest correlation (*r*<sup>2</sup>) to a haplotype identified in a subset of markers with at least 98% of samples having genotype call confidence of 0.98

**Table S4. All Genome-Wide Significant Regions Identified in Kosraen Data**

| Trait                    | Chr       | Haplotype start    | Haplotype end      | <i>f</i>     | Hom ref <sup>1</sup> | Het <sup>1</sup> | Hom mut <sup>1</sup> | OR          | Sequenced | <i>P</i> DASH <sup>2</sup> | <i>P</i> GWAS <sup>3</sup> | conditioned <i>P</i> DASH <sup>4</sup> | Published relevant associations |
|--------------------------|-----------|--------------------|--------------------|--------------|----------------------|------------------|----------------------|-------------|-----------|----------------------------|----------------------------|----------------------------------------|---------------------------------|
| <b>Folate</b>            | <b>19</b> | <b>10,738,387</b>  | <b>10,755,240</b>  | <b>3.2%</b>  | <b>1,758</b>         | <b>118</b>       | <b>6</b>             | <b>1.68</b> | <b>1</b>  | <b>6.4E-08</b>             | <b>6.7E-05</b>             | <b>5.1E-05</b>                         | <b><i>LDLR; TYK2</i></b>        |
| HBA1C                    | 16        | 87,308,019         | 87,339,751         | 4.4%         | 981                  | 98               | 0                    | 0.52        | 2         | 2.0E-09                    | 6.3E-08                    | 4.3E-05                                |                                 |
| HBA1C                    | 16        | 88,656,265         | 88,690,776         | 2.9%         | 1,032                | 45               | 2                    | 0.45        | 1         | 8.6E-09                    | 9.4E-04                    | 1.0E-06                                |                                 |
| <b>LDL</b>               | <b>12</b> | <b>99,350,824</b>  | <b>99,608,800</b>  | <b>2.8%</b>  | <b>2,615</b>         | <b>160</b>       | <b>0</b>             | <b>0.59</b> | <b>0</b>  | <b>1.0E-08</b>             | <b>1.0E-04</b>             | <b>2.5E-06</b>                         |                                 |
| <b>Total Cholesterol</b> | <b>6</b>  | <b>161,091,801</b> | <b>161,107,669</b> | <b>13.4%</b> | <b>2,065</b>         | <b>642</b>       | <b>46</b>            | <b>1.33</b> | <b>1</b>  | <b>6.9E-11</b>             | <b>2.5E-06</b>             | <b>4.9E-06</b>                         | <b><i>LPA</i></b>               |
| <b>Total Cholesterol</b> | <b>12</b> | <b>99,321,530</b>  | <b>99,350,824</b>  | <b>2.7%</b>  | <b>2,603</b>         | <b>150</b>       | <b>0</b>             | <b>0.54</b> | <b>0</b>  | <b>9.1E-11</b>             | <b>5.9E-04</b>             | <b>1.6E-08</b>                         |                                 |
| Triglycerides            | 11        | 116,105,036        | 116,272,109        | 32.1%        | 1,245                | 1,236            | 273                  | 1.27        | 4         | 2.6E-13                    | 3.0E-12                    | 0.01                                   | <i>APOA1, APOA5</i>             |
| TSH                      | 9         | 97,467,378         | 97,674,793         | 14.0%        | 1,371                | 429              | 58                   | 0.71        | 1         | 2.6E-11                    | 2.4E-14                    | <i>NS</i>                              |                                 |
| <b>Uric Acid</b>         | <b>11</b> | <b>64,653,308</b>  | <b>64,661,484</b>  | <b>1.8%</b>  | <b>1,796</b>         | <b>65</b>        | <b>0</b>             | <b>0.13</b> | <b>2</b>  | <b>5.5E-48</b>             | <b>3.7E-17</b>             | <b>2.3E-33</b>                         | <b><i>SLC22A11-12</i></b>       |
| <b>Uric Acid</b>         | <b>19</b> | <b>63,081,167</b>  | <b>63,093,854</b>  | <b>1.6%</b>  | <b>1,797</b>         | <b>64</b>        | <b>0</b>             | <b>0.46</b> | <b>0</b>  | <b>9.3E-08</b>             | <b>3.4E-03</b>             | <b>9.5E-06</b>                         |                                 |

<sup>1</sup>Number of phenotyped carriers  
<sup>2</sup>Most significant association in locus, conditionally independent of all nearby haplotypes  
<sup>3</sup>Most significant nearby single marker association  
<sup>4</sup>Least significant haplotype association after conditioning on all nearby single markers

**Table S5. All Genome-Wide Significant, Localized Regions Identified in Kosraen Data**

| Trait                    | Chr       | Haplotype start    | Haplotype end      | <i>f</i>     | Hom ref <sup>1</sup> | Het <sup>1</sup> | Hom mut <sup>1</sup> | OR          | Sequenced | <i>P</i> DASH <sup>2</sup> | <i>P</i> GWAS <sup>3</sup> | conditioned <i>P</i> DASH <sup>4</sup> | Published relevant associations |
|--------------------------|-----------|--------------------|--------------------|--------------|----------------------|------------------|----------------------|-------------|-----------|----------------------------|----------------------------|----------------------------------------|---------------------------------|
| C-Reactive Protein       | 1         | 156,427,059        | 156,492,709        | 24.7%        | 1,048                | 713              | 111                  | 1.28        | 3         | 8.2E-09                    | 9.0E-09                    | <i>NS</i>                              | <i>SPTA1</i>                    |
| C-Reactive Protein       | 19        | 50,153,836         | 50,169,221         | 12.3%        | 1,413                | 434              | 25                   | 0.73        | 1         | 3.6E-09                    | 6.5E-13                    | <i>NS</i>                              | <i>APOE, APOC</i>               |
| <b>HBA1C</b>             | <b>16</b> | <b>87,261,769</b>  | <b>87,465,349</b>  | <b>9.9%</b>  | <b>872</b>           | <b>201</b>       | <b>6</b>             | <b>0.47</b> | <b>3</b>  | <b>2.5E-24</b>             | <b>6.3E-08</b>             | <b>2.1E-17</b>                         |                                 |
| <b>LDL</b>               | <b>19</b> | <b>46,645,270</b>  | <b>46,787,809</b>  | <b>1.0%</b>  | <b>2,719</b>         | <b>56</b>        | <b>0</b>             | <b>0.45</b> | <b>0</b>  | <b>2.1E-08</b>             | <b>1.7E-06</b>             | <b>1.0E-03</b>                         |                                 |
| LDL                      | 19        | 50,114,427         | 50,255,095         | 12.4%        | 2,120                | 621              | 34                   | 1.43        | 1         | 5.0E-17                    | 1.1E-23                    | <i>NS</i>                              | <i>APOE, APOC</i>               |
| <b>Total Cholesterol</b> | <b>11</b> | <b>116,106,921</b> | <b>116,111,104</b> | <b>23.5%</b> | <b>1,587</b>         | <b>1,024</b>     | <b>142</b>           | <b>1.21</b> | <b>4</b>  | <b>8.5E-08</b>             | <b>2.0E-05</b>             | <b>9.1E-04</b>                         | <b>APOA1, APOA5</b>             |
| Total Cholesterol        | 19        | 50,065,116         | 50,254,711         | 12.4%        | 2,103                | 616              | 34                   | 1.40        | 1         | 5.8E-15                    | 8.7E-18                    | <i>NS</i>                              | <i>APOE, APOC</i>               |
| <b>Triglycerides</b>     | <b>11</b> | <b>116,147,610</b> | <b>116,157,417</b> | <b>27.4%</b> | <b>1,446</b>         | <b>1,103</b>     | <b>205</b>           | <b>1.31</b> | <b>4</b>  | <b>2.2E-15</b>             | <b>3.0E-12</b>             | <b>6.8E-05</b>                         | <b>APOA1, APOA5</b>             |
| TSH                      | 9         | 97,613,702         | 97,676,546         | 18.1%        | 1,261                | 507              | 90                   | 0.72        | 1         | 1.6E-12                    | 2.4E-14                    | <i>NS</i>                              | <i>PTCH1</i>                    |
| Uric Acid                | 11        | 64,117,281         | 64,341,535         | 1.8%         | 1,796                | 65               | 0                    | 0.13        | 2         | 6.6E-49                    | 9.6E-35                    | 2.9E-17                                | <i>SLC22A11-12</i>              |

<sup>1</sup>Number of phenotyped carriers

<sup>2</sup>Most significant association in locus, conditionally independent of all nearby haplotypes

<sup>3</sup>Most significant nearby single marker association

<sup>4</sup>Least significant haplotype association after conditioning on all nearby single markers

**Table S6. Phenotype Summary for Kosraen Data**

| <b>Trait</b>                         | <b>Abbreviation</b> | <b>Total Samples</b> |
|--------------------------------------|---------------------|----------------------|
| Body Mass Index                      | BMI                 | 2,369                |
| Cornell voltage                      | CLVresstd           | 1,576                |
| C-Reactive Protein                   | logCRP              | 1,872                |
| Diastolic Blood Pressure             | DBP                 | 2,520                |
| Fasting Blood Sugar                  | FBS                 | 1,753                |
| Folic Acid                           | Folate              | 1,882                |
| Height                               | HeightZ             | 2,364                |
| Hemoglobin A1c                       | HBA1C               | 1,079                |
| High Density Lipoprotein Cholesterol | HDL                 | 2,774                |
| Homocysteine                         | Homocysteine        | 1,870                |
| Insulin Sensitivity                  | INSD                | 1,166                |
| Leptin                               | LEP                 | 2,849                |
| Low Density Lipoprotein Cholesterol  | LDL                 | 2,775                |
| Percentage of Body Fat               | pctfat              | 1,796                |
| PR interval                          | PRresstd            | 1,595                |
| QRS interval                         | QRSduresstd         | 1,573                |
| Resting rate interval                | RRresstd            | 1,513                |
| Sokolow-Lyon voltage                 | SLVresstd           | 1,541                |
| Systolic Blood Pressure              | SBP                 | 2,521                |
| Thyroid Stimulating Hormone          | TSH                 | 1,858                |
| Total Cholesterol Levels             | TC                  | 2,753                |
| Triglyceride                         | TG                  | 2,754                |
| Uric Acid                            | logUrate            | 1,861                |
| Waist Circumference                  | waist               | 2,814                |
| Weight                               | WT                  | 2,335                |

**Table S7. Phenotype Summary for WTCCC Data**

| Trait                   |     | Cases |
|-------------------------|-----|-------|
| Bipolar Disorder        | BD  | 1,998 |
| Coronary Artery Disease | CAD | 1,988 |
| Chron's Disease         | CD  | 2,005 |
| Hypertension            | HT  | 2,001 |
| Rheumatoid Arthritis    | RA  | 1,999 |
| Type 1 Diabetes         | T1D | 2,000 |
| Type 2 Diabetes         | T2D | 1,999 |



**Table S8. Initial and Replicated Haplotype Association with HBA1c**

| Cohort          | Start      | End        | SNPs | $f^1$ | PVAL    | corrected <sup>2</sup><br>PVAL | OR   |
|-----------------|------------|------------|------|-------|---------|--------------------------------|------|
| Kosrae          | 87,261,769 | 87,465,349 | 10   | 9.95% | 2.5E-24 | 8.5E-19                        | 0.47 |
| DGI replication | 87,404,625 | 87,560,132 | 16   | 0.63% | 3.9E-05 | 0.015                          | 0.19 |

<sup>1</sup>Frequency in entire cohort  
<sup>2</sup>Bonferroni corrected for all haplotypes tested

**Table S9. Functional Variants Present in Carriers of Two Associated Haplotypes**

| Haplotype carriers |          |           |          |          | Haplotype non-carriers |          |           |          |          |           |                   |                |              |                  |                           |
|--------------------|----------|-----------|----------|----------|------------------------|----------|-----------|----------|----------|-----------|-------------------|----------------|--------------|------------------|---------------------------|
| avg cov            | no call  | wild-type | het.     | hom. var | avg cov                | no call  | wild-type | het.     | hom. var | chr       | Position          | Gene           | dbSNP        | SIFT prediction  | Haplotype-SNV correlation |
| 2                  | 2        | 0         | 1        | 0        | 1                      | 1        | 3         | 0        | 0        | 16        | 87,240,737        | CYBA           | rs4673:G     | TOLERATED        | 0.003                     |
| 2                  | 2        | 0         | 0        | 1        | 1                      | 4        | 0         | 0        | 0        | 16        | 87,306,116        | C16orf84       | rs7205989:A  | DAMAGING         | 0.051                     |
| 1                  | 2        | 0         | 0        | 1        | 0                      | 4        | 0         | 0        | 0        | 16        | 87,399,646        | CDT1           | rs507329:C   | TOLERATED        | -                         |
| <b>5</b>           | <b>0</b> | <b>0</b>  | <b>2</b> | <b>1</b> | <b>1</b>               | <b>3</b> | <b>1</b>  | <b>0</b> | <b>0</b> | <b>16</b> | <b>87,821,231</b> | <b>ZNF778</b>  | <b>novel</b> | <b>DAMAGING</b>  | <b>0.001</b>              |
| 2                  | 2        | 0         | 0        | 1        | 2                      | 3        | 1         | 0        | 0        | 16        | 87,875,539        | ANKRD11        | novel        | TOLERATED        | 0.122                     |
| 12                 | 0        | 2         | 1        | 0        | 9                      | 0        | 4         | 0        | 0        | 16        | 87,877,261        | ANKRD11        | novel        | TOLERATED        | -                         |
| <b>8</b>           | <b>0</b> | <b>1</b>  | <b>2</b> | <b>0</b> | <b>7</b>               | <b>0</b> | <b>4</b>  | <b>0</b> | <b>0</b> | <b>16</b> | <b>87,878,113</b> | <b>ANKRD11</b> | <b>novel</b> | <b>TOLERATED</b> | <b>-</b>                  |

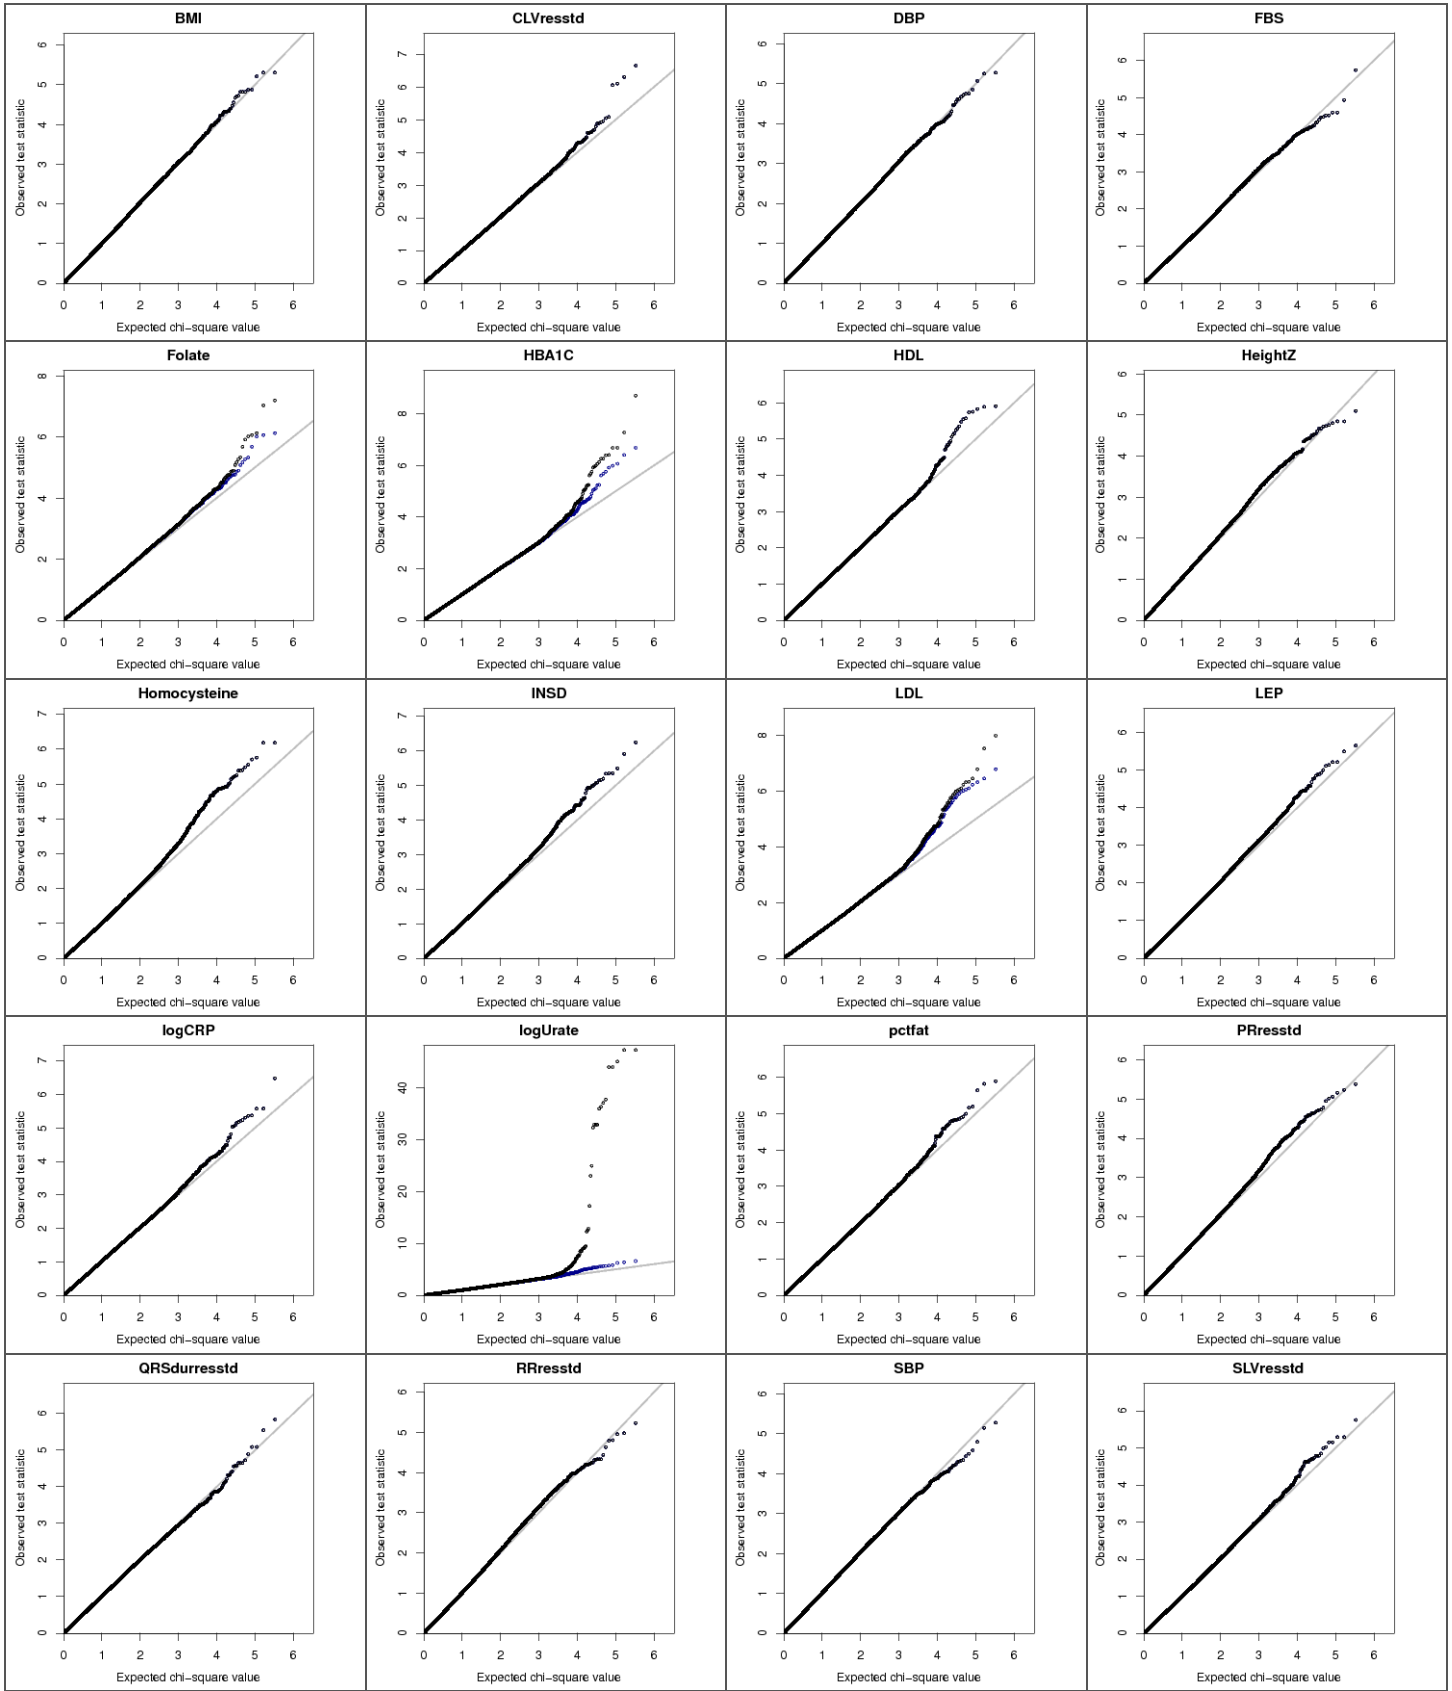

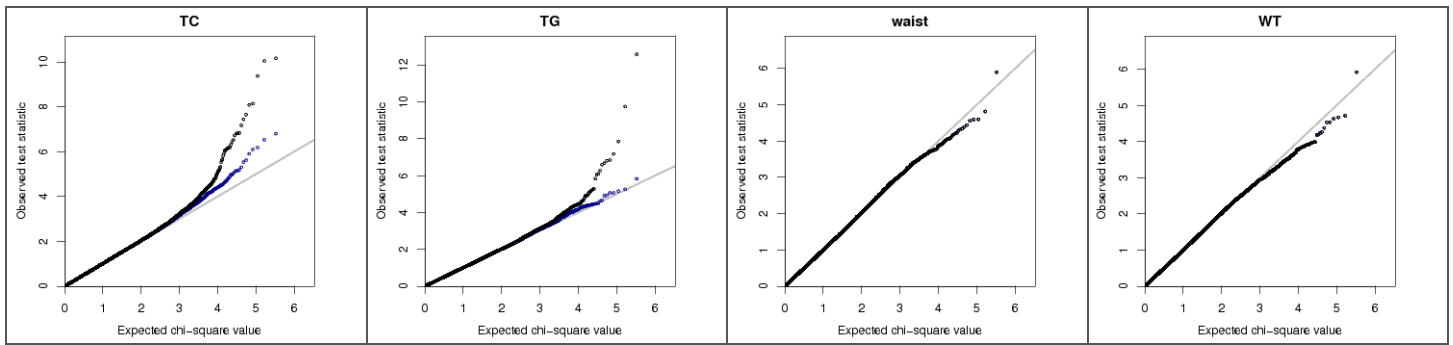

**Figure S1. Quantile-Quantile Plot of All Phenotypes Analyzed in Kosraen Cohort**

For each of the seven disease traits, a quantil-quantile plot of the allelic association test across all DASH haplotypes having carrier frequency  $>0.1\%$  is shown in black. Quantile-quantile plot after removing all haplotypes in regions of significant association (Table 1, Supplementary Table 2) is overlaid in blue. Grey line shows the null distribution.

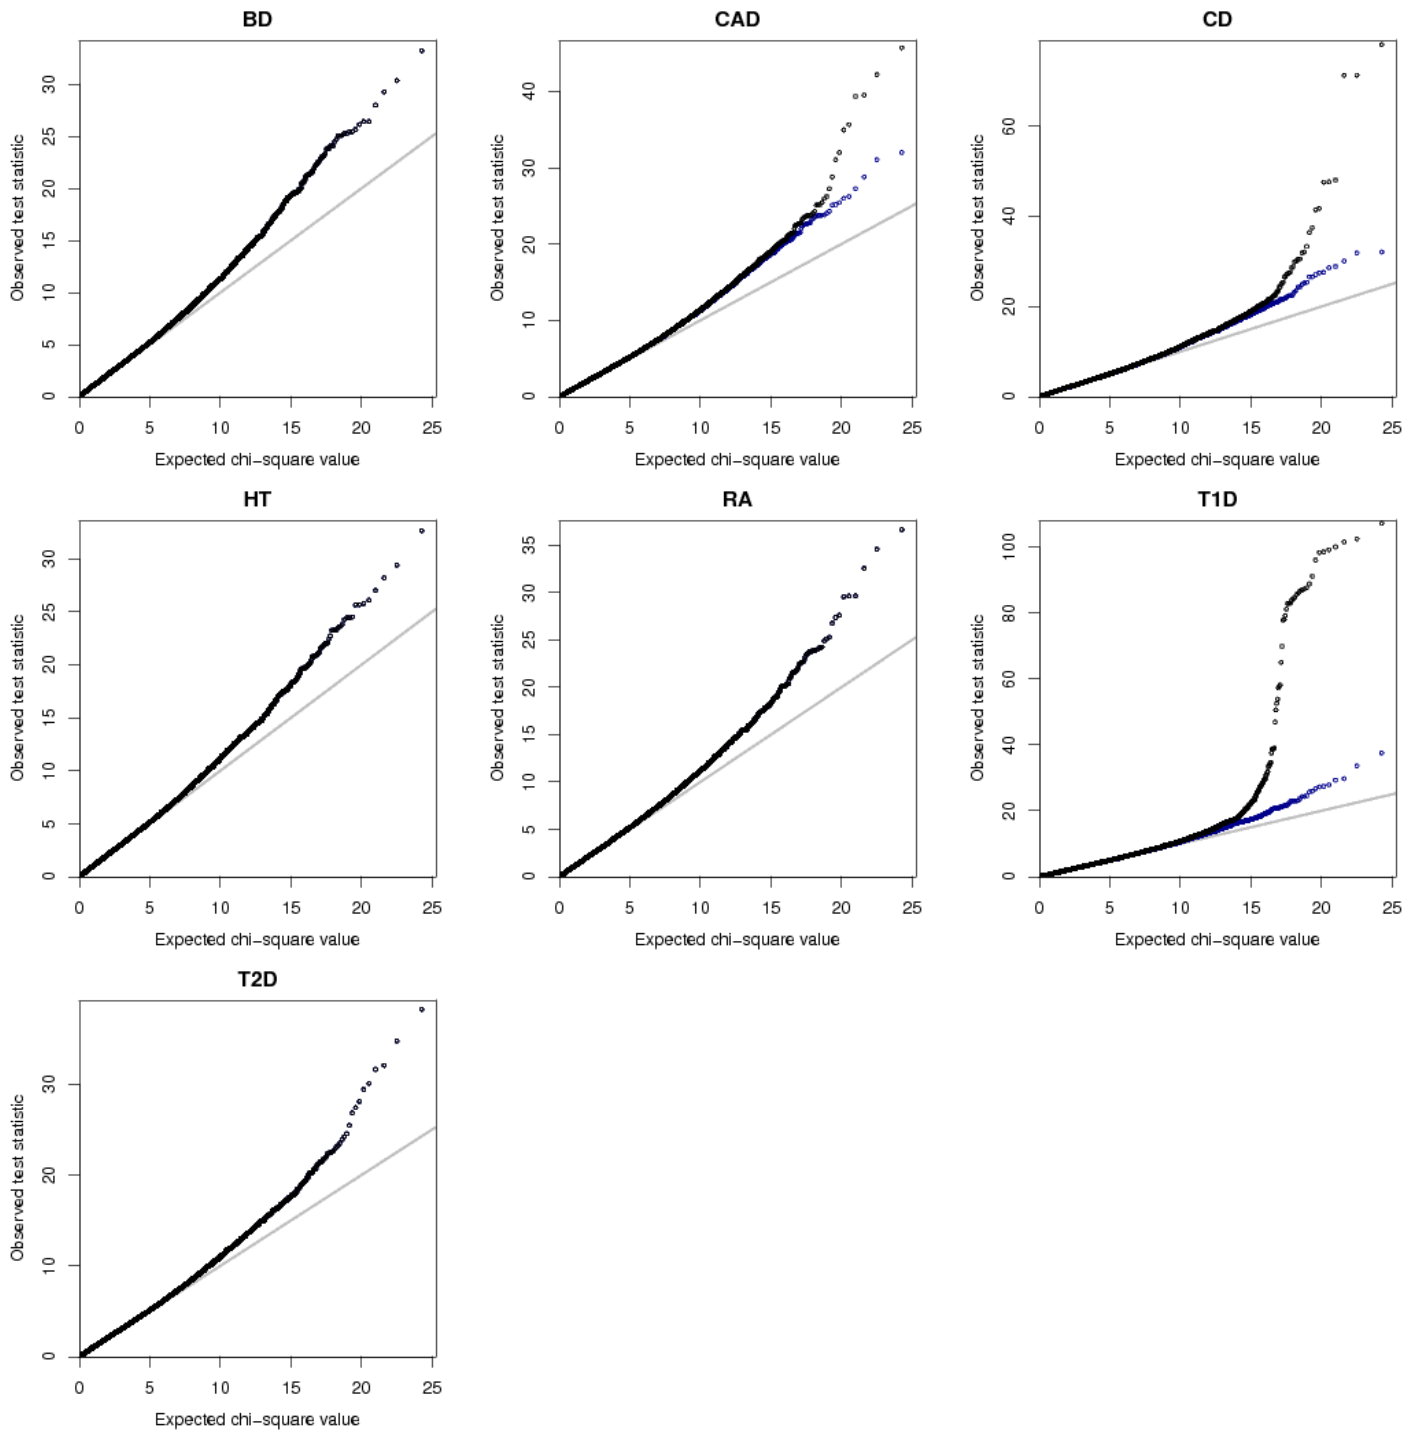

**Figure S2. Quantile-Quantile Plot of all phenotypes Analyzed in WTCCC Cohort**

For each of the seven disease traits, a quantil-quantile plot of the allelic association test across all DASH haplotypes having carrier frequency  $>0.1\%$  is shown in black. Quantile-quantile plot after removing all haplotypes in regions of significant association (Table 1, Supplementary Table 2) is overlaid in blue. Grey line shows the null distribution.

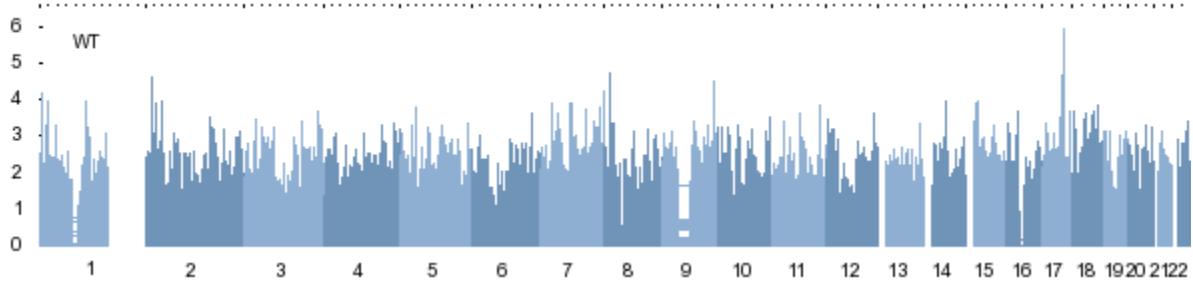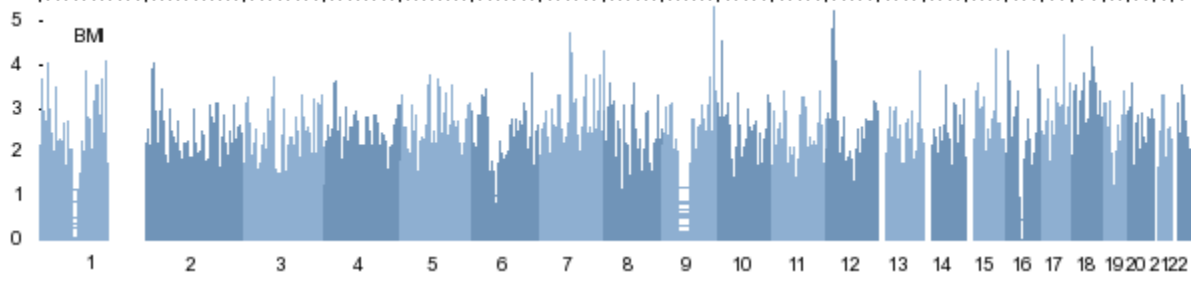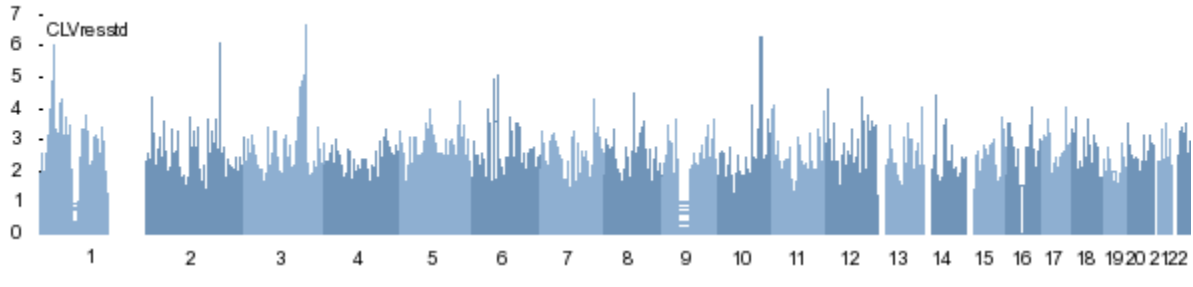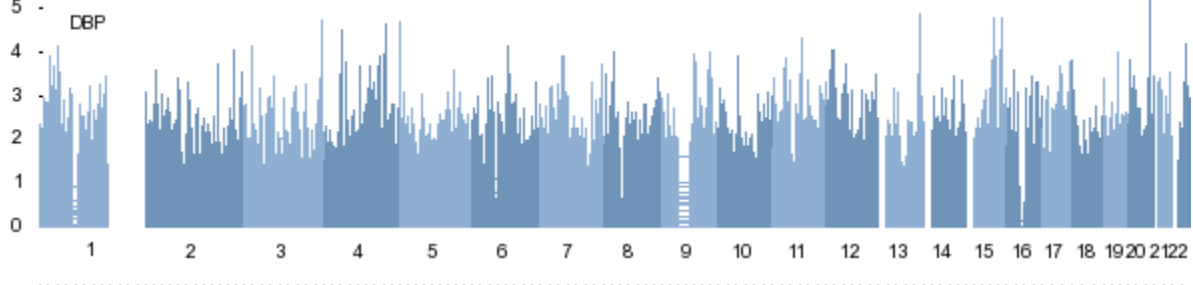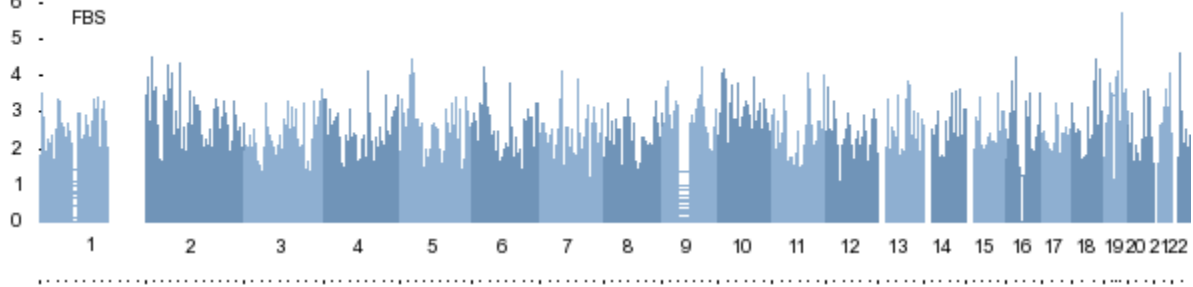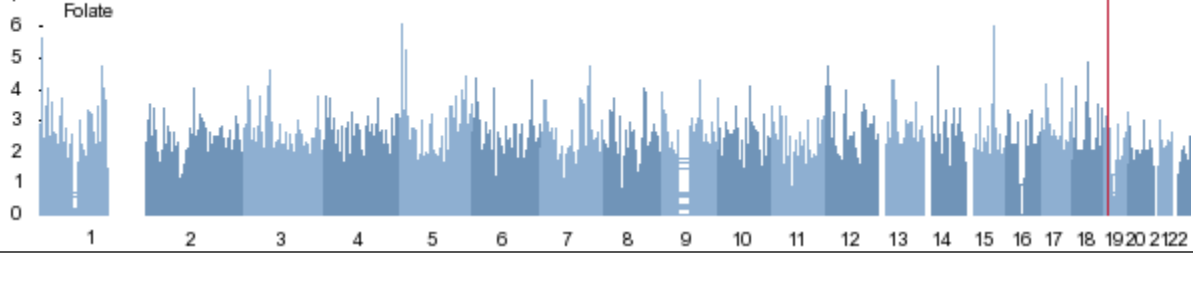

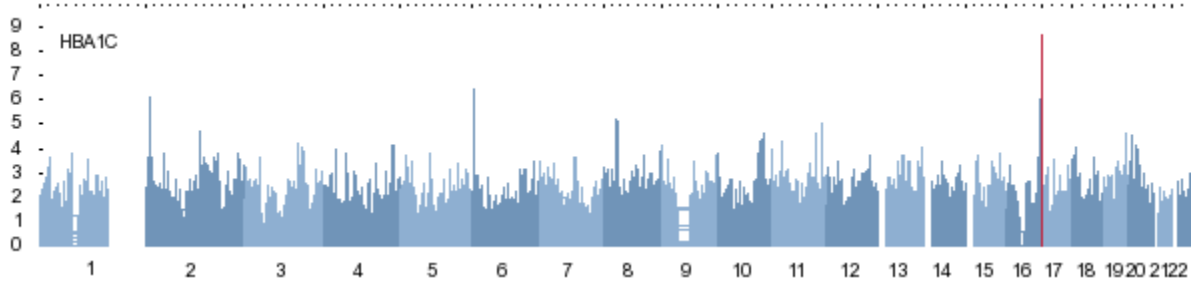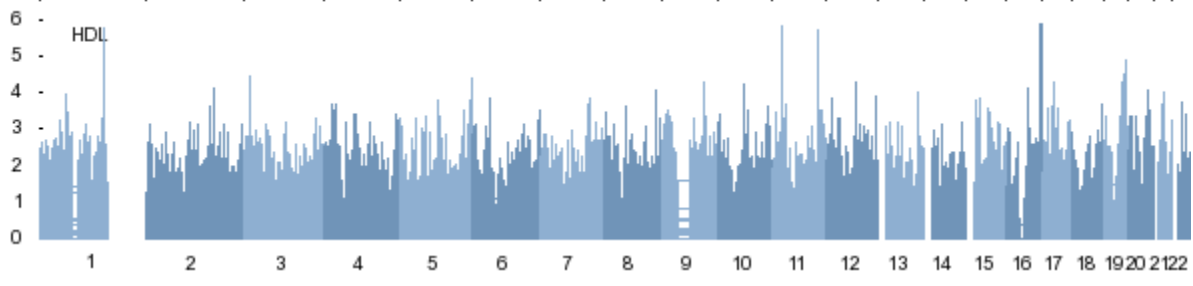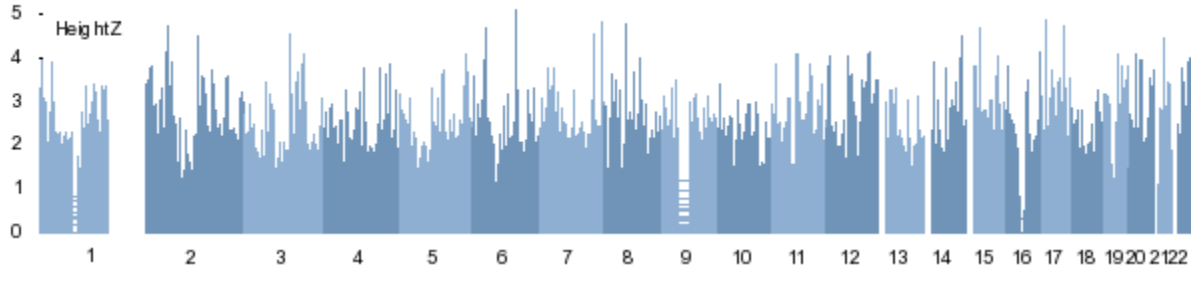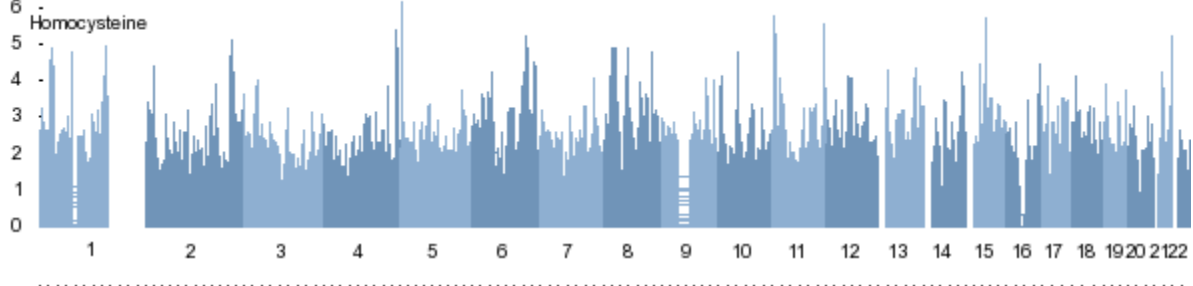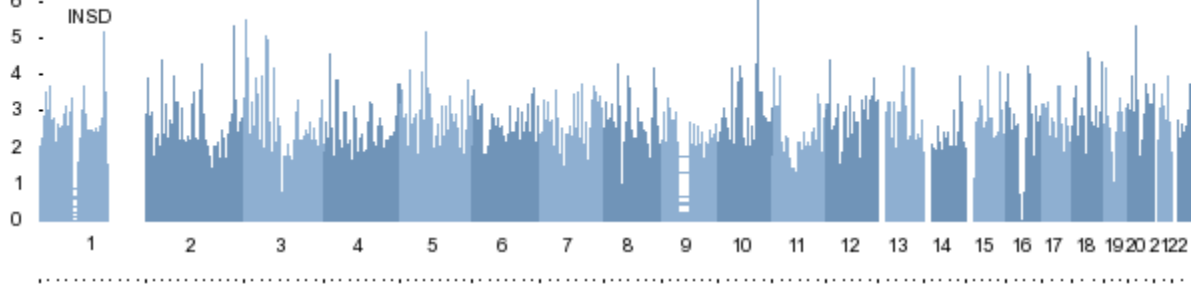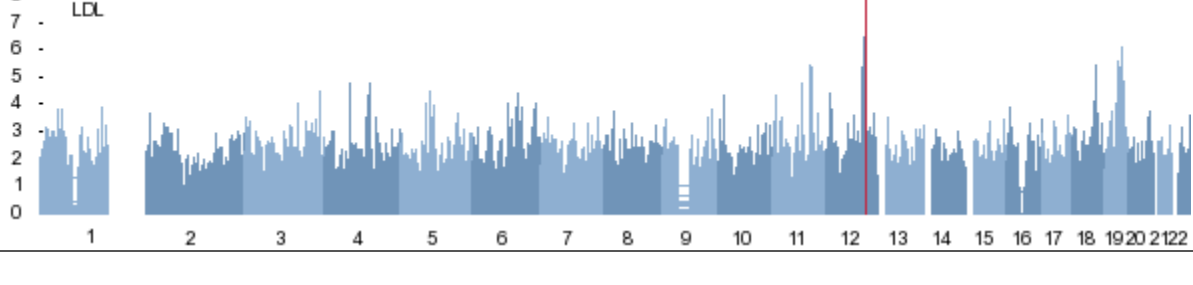

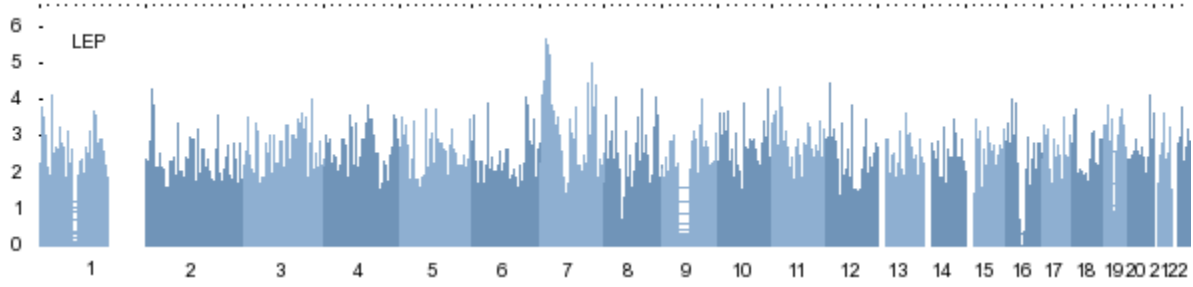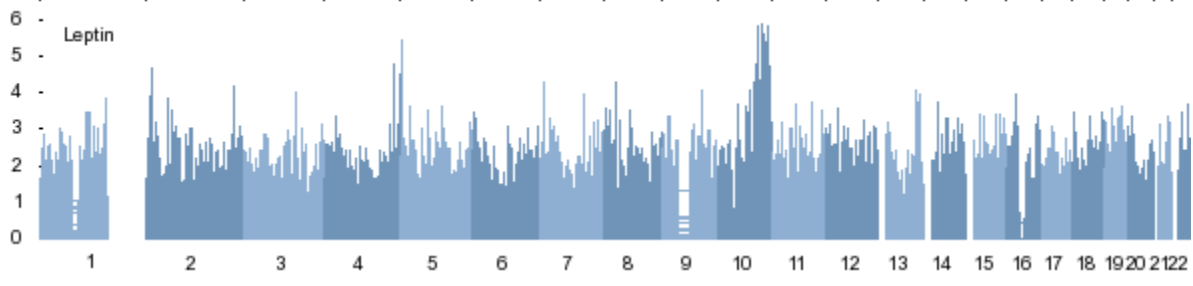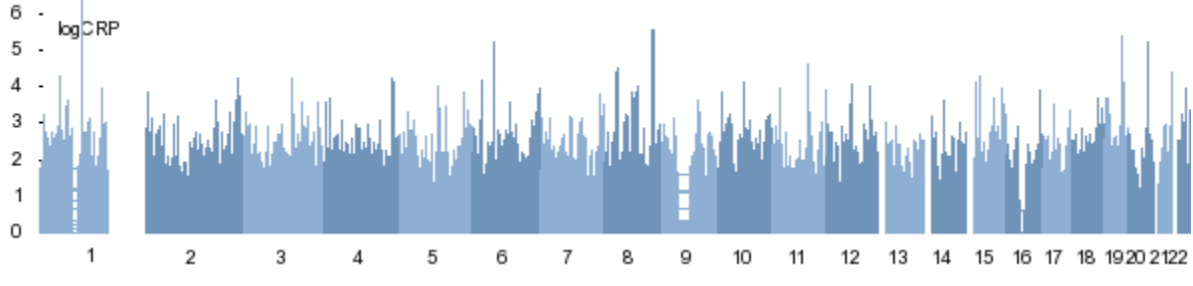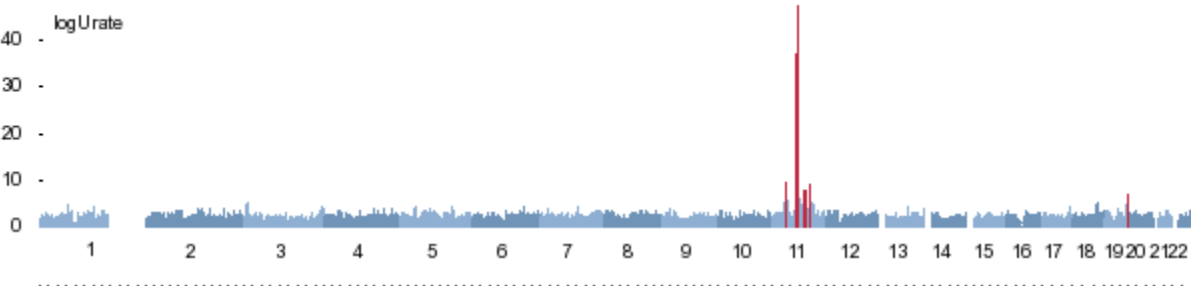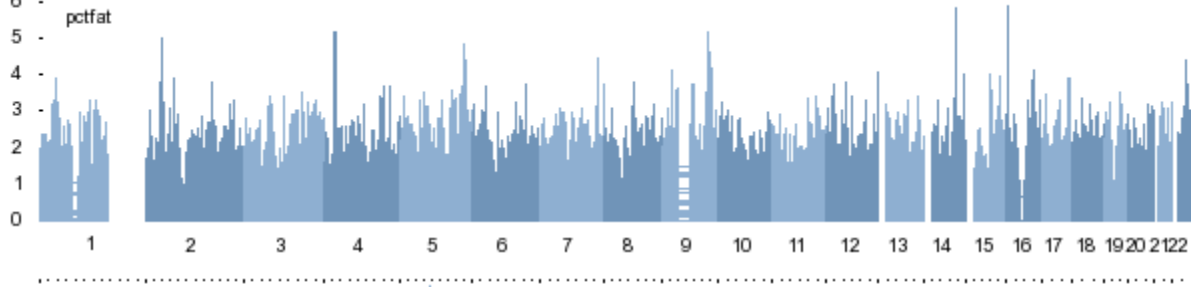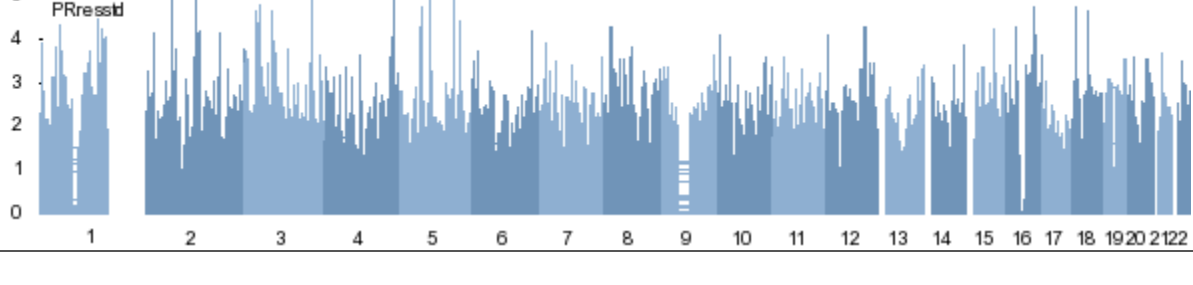



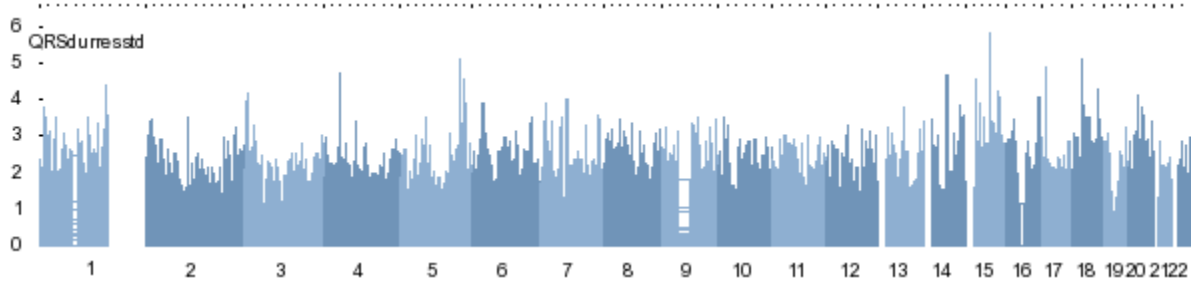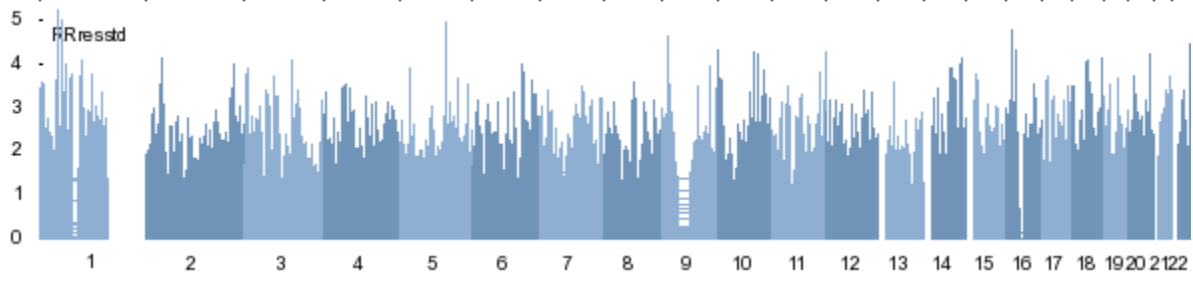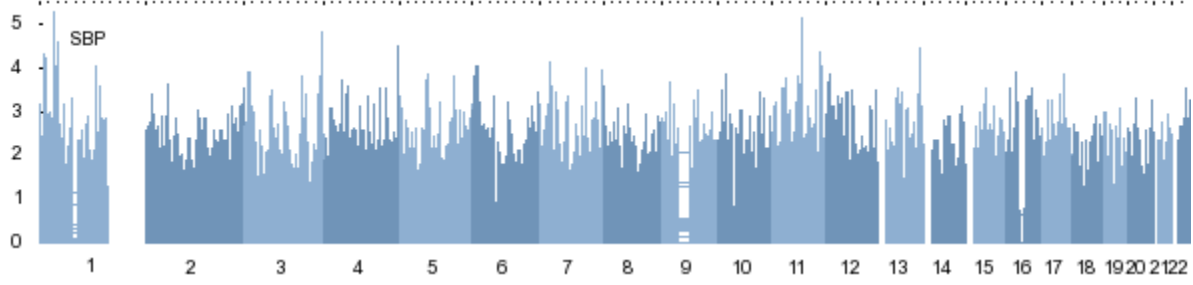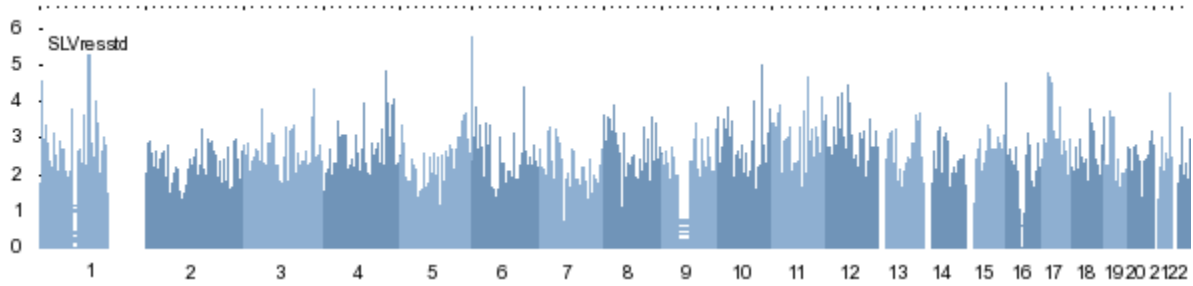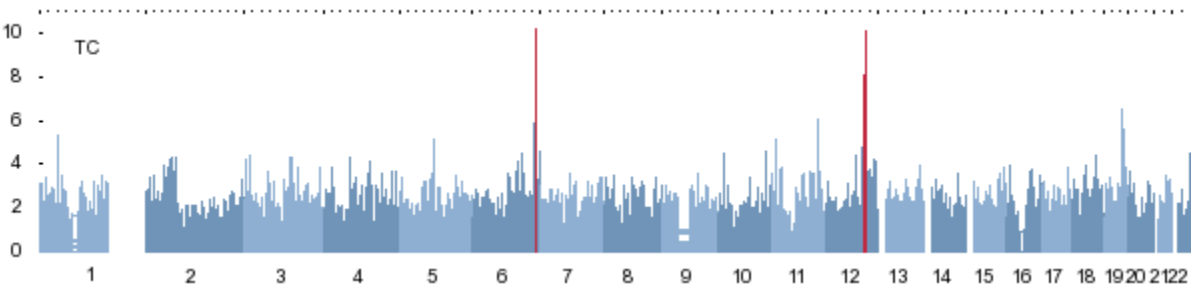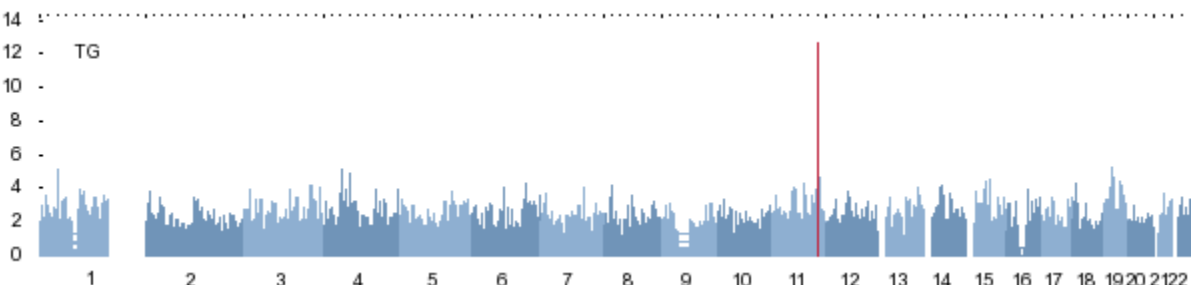

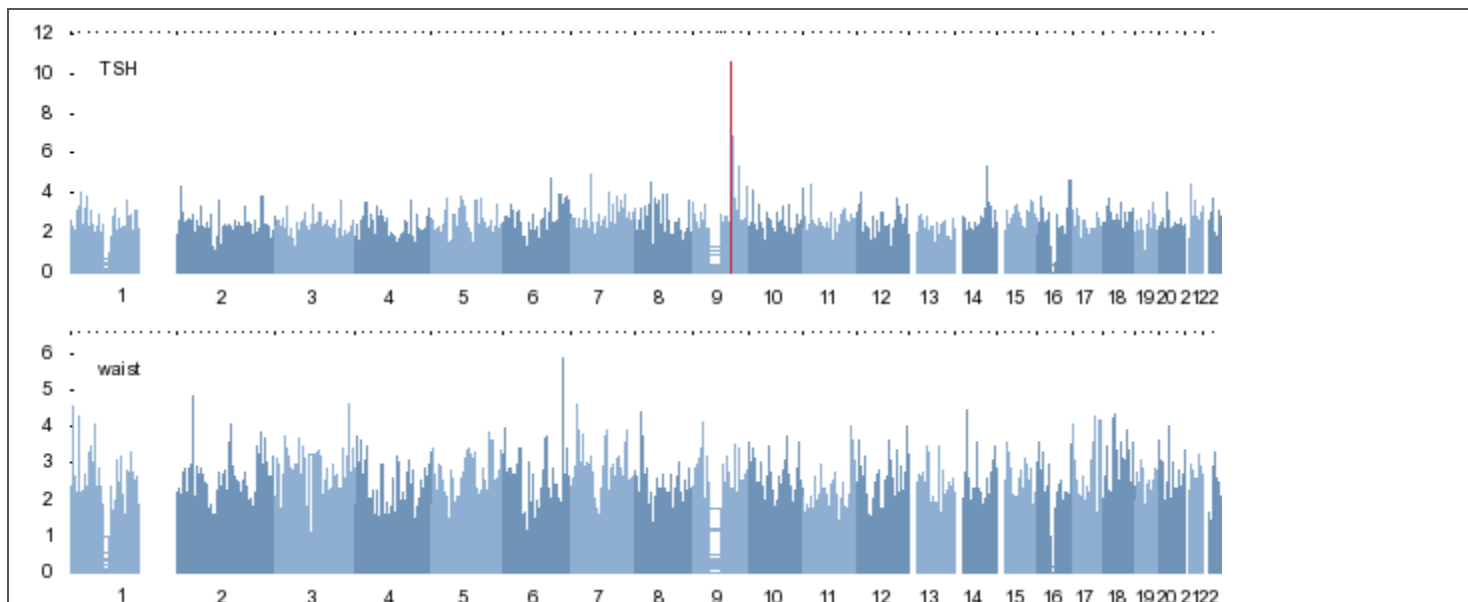

**Figure S3. Manhattan Haplotype Plot of All Phenotypes Analyzed in Kosraen Cohort**

For each of the seven disease traits  $-\log_{10}$  of the allelic P-value for all DASH haplotypes having carrier frequency  $>0.1\%$  are plotted as bars corresponding to their position in the chromosome. Chromosomes are shown in alternating colors with haplotypes surpassing genome-wide significance ( $1.5 \times 10^{-7}$ ) shown in red.

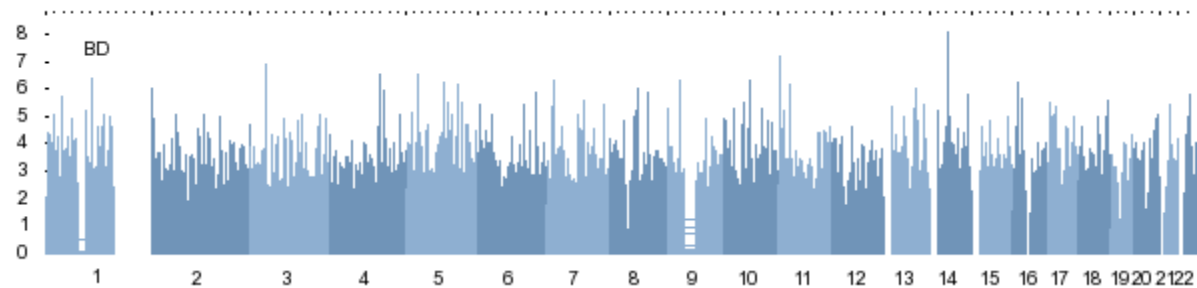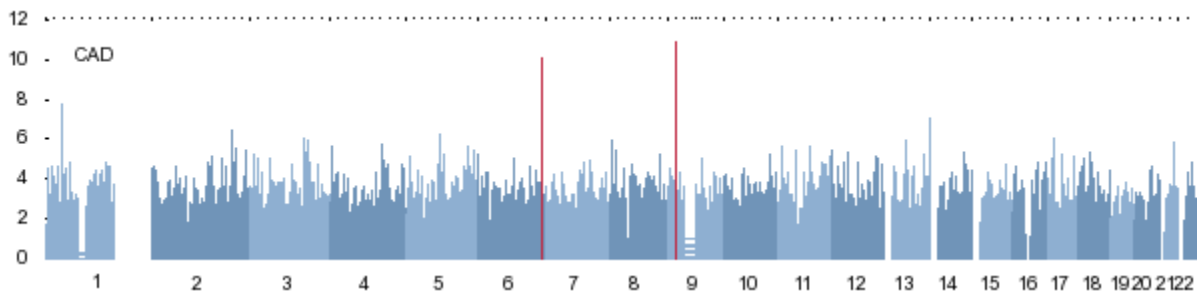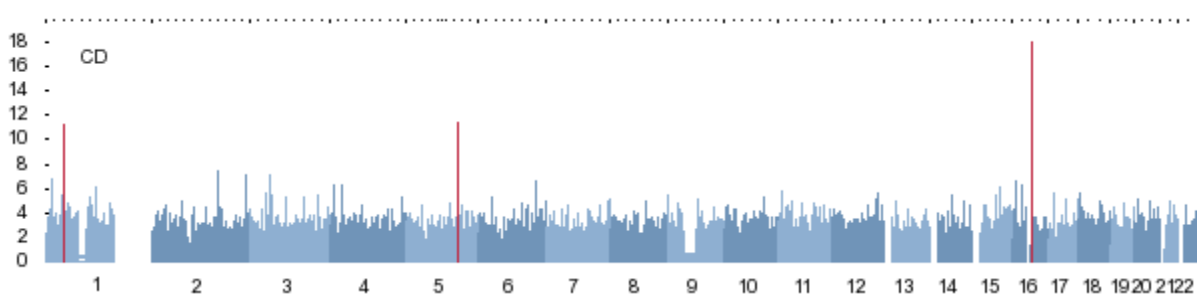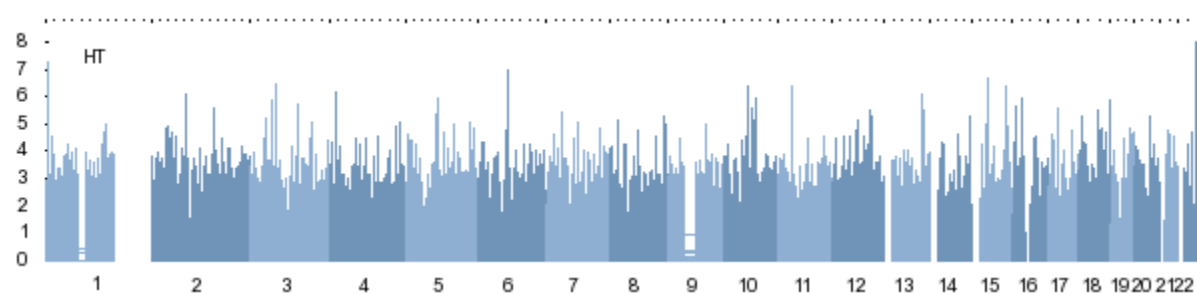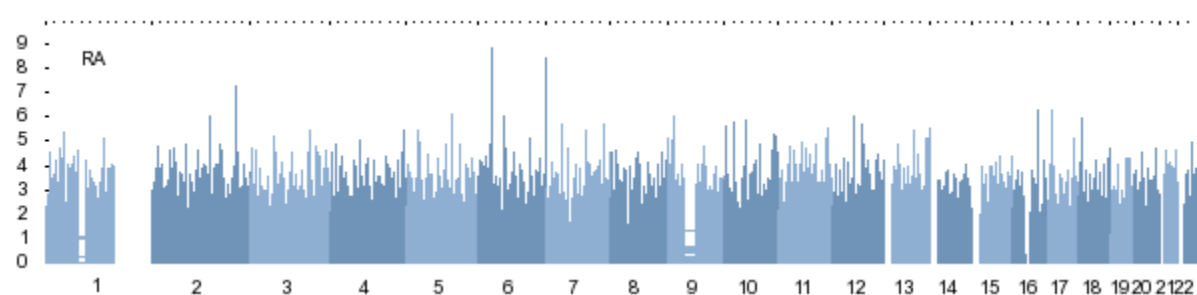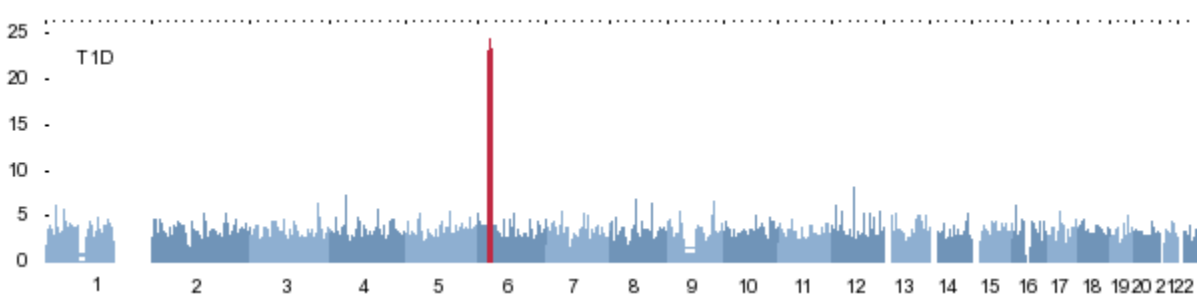

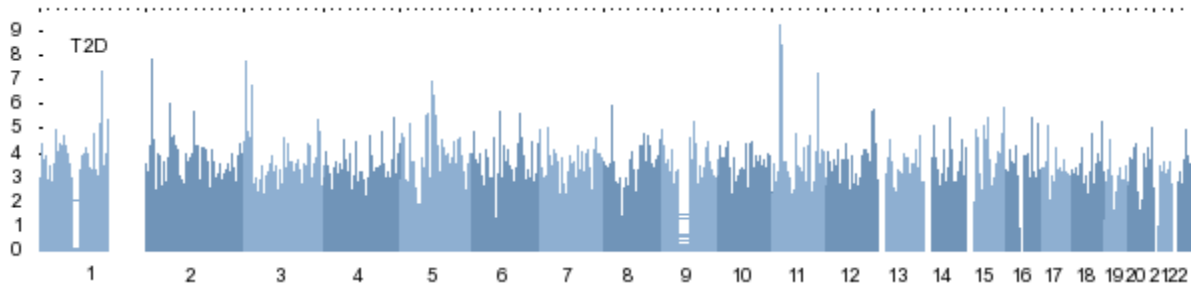

**Figure S4. Manhattan Haplotype Plot of All Phenotypes Analyzed in WTCCC Cohort**

For each of the seven disease traits  $-\log_{10}$  of the allelic P-value for all DASH haplotypes having carrier frequency  $>0.1\%$  are plotted as bars corresponding to their position in the chromosome. Chromosomes are shown in alternating colors with haplotypes surpassing empirical genome-wide significance ( $2.5 \times 10^{-8}$ ) shown in red.

A: Association power in Kosraen cohort

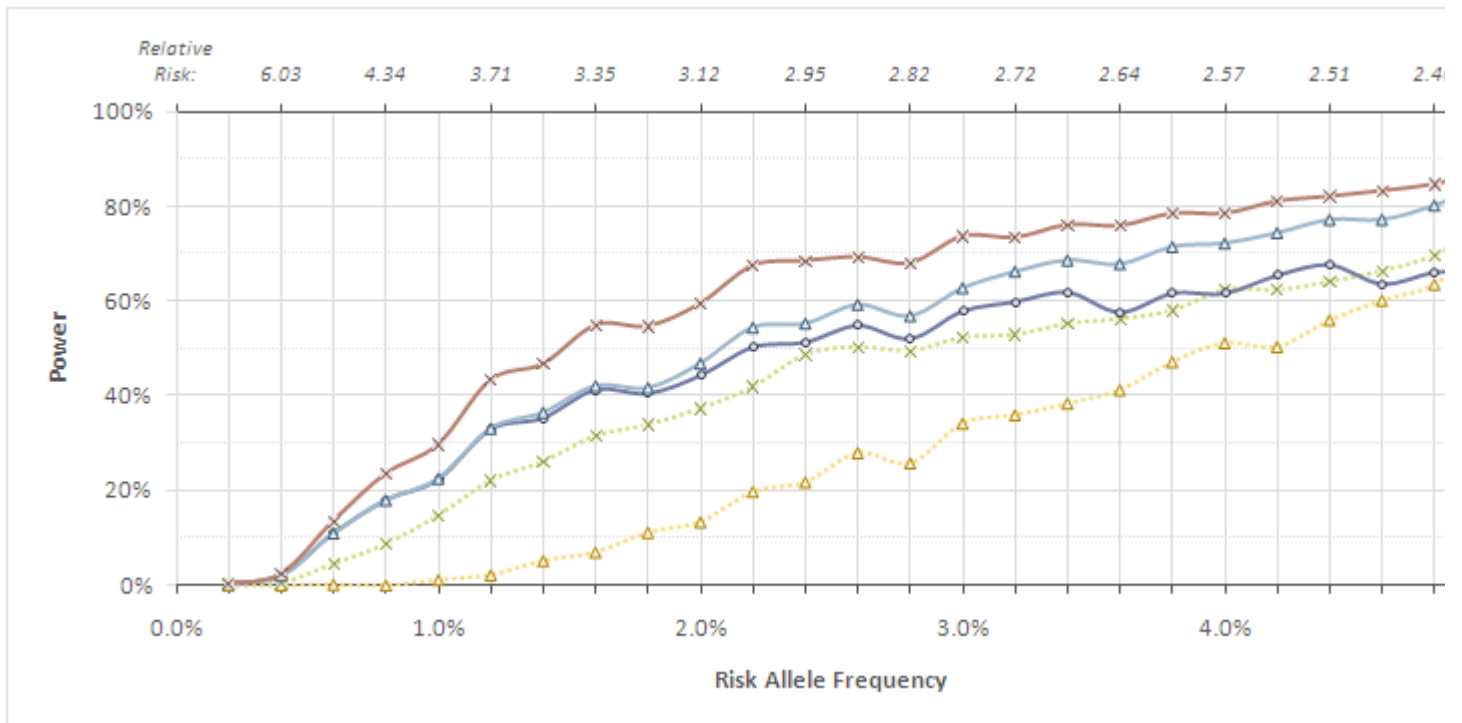

B: Association power in WTCCC

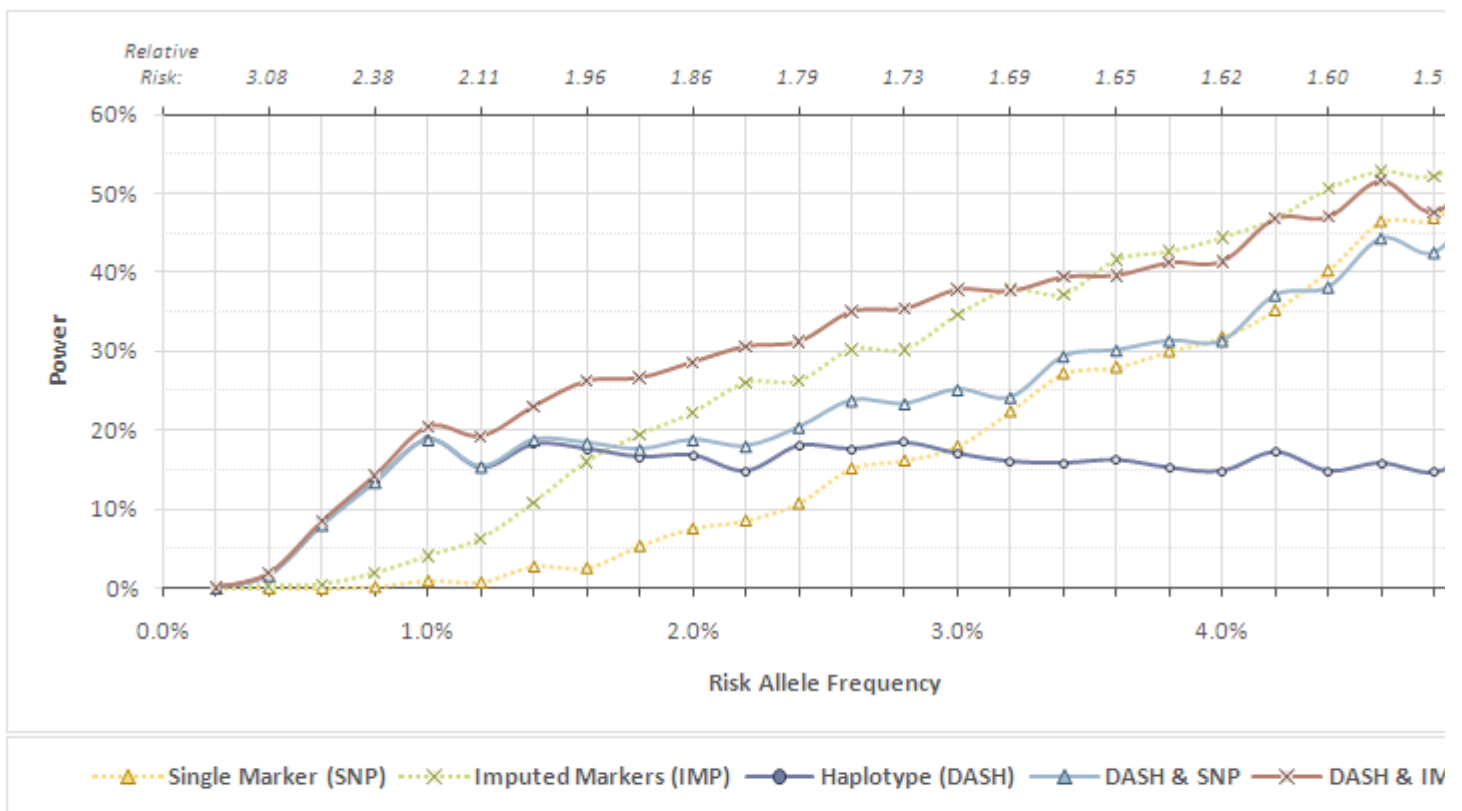

Figure S5. Detailed Simulated Power Analysis

Power to detect a single rare variant at risk allele frequency range of (0%,5%) with proxy markers of MAF  $\geq$  5%. Lower x-axis details planted variant allele frequency and upper x-axis details corresponding relative risk. Tested separately were single markers (yellow triangle, SNP); imputation from HapMap reference and single markers (green cross, IMP); DASH

haplotypes (blue circle, DASH); DASH haplotypes and single markers (blue triangle, DASH & SNP); DASH haplotypes and imputed markers (brown cross, DASH & IMP). Each point represents power to detect genome-wide significant association at 500 randomly planted markers. Panel A plots results in isolate cohort from Kosrae, Micronesia (imputed from JPTCHB reference); Panel B plots results in European cohort from WTCCC (imputed from CEU reference).

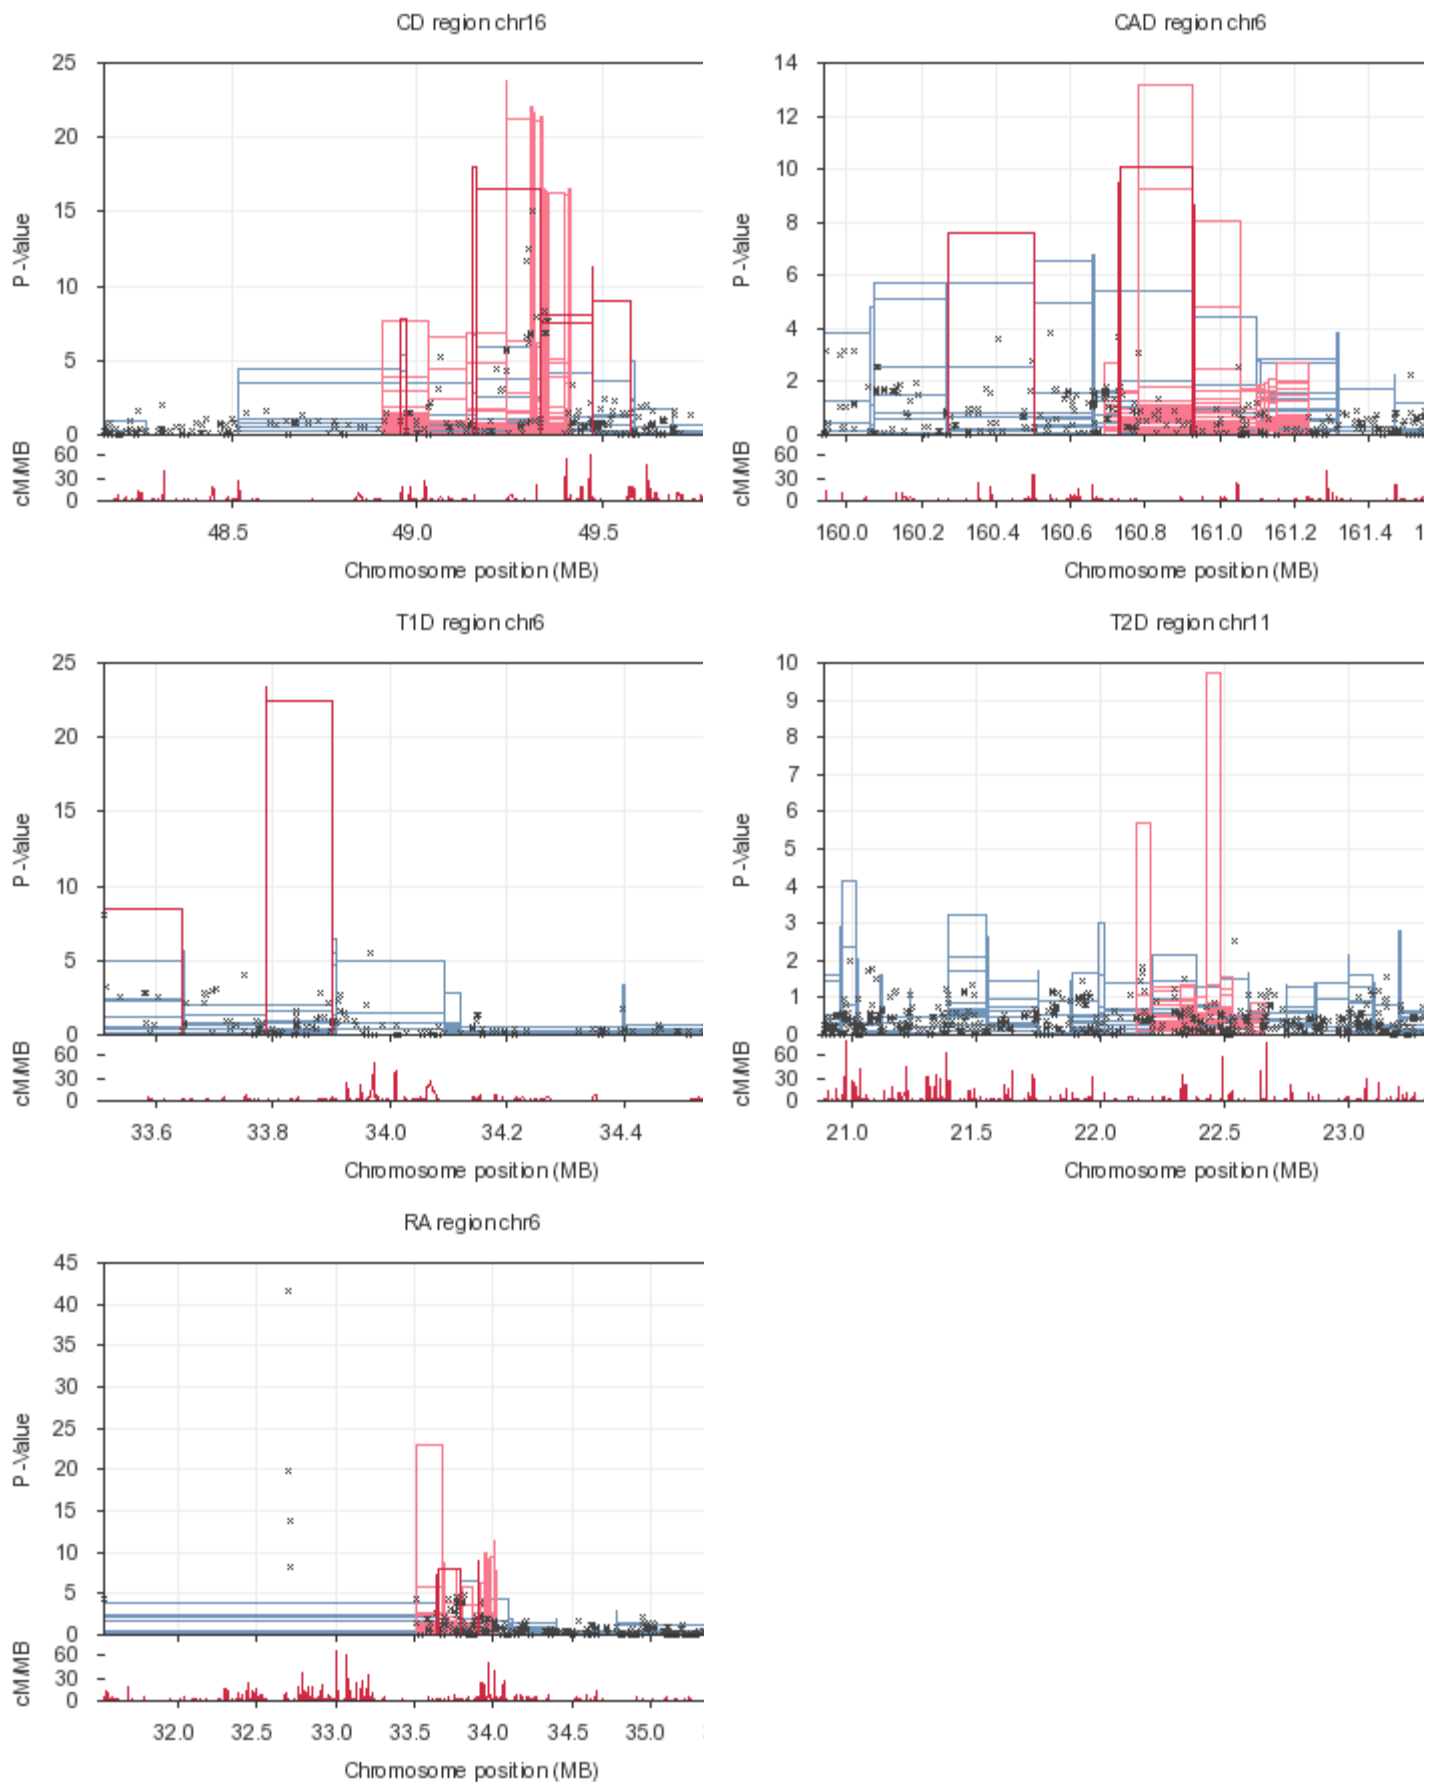

Figure S6. Regions Showing Strong Evidence of Association in European Cohort

Haplotype boundaries represented as blue bars with height of bar corresponding to allelic  $P$ -value; genome-wide significant haplotypes shown in red; single marker associations shown as black cross. Lower panel details physical position along chromosome and fine-scale recombination map from HapMap reference.



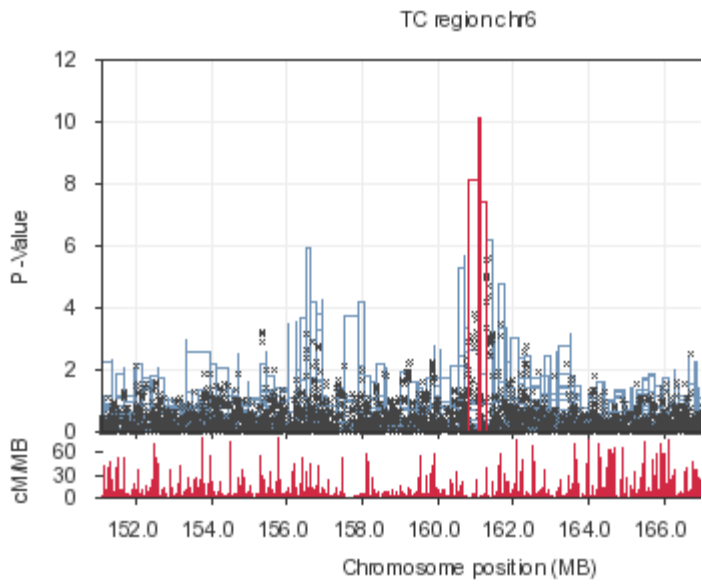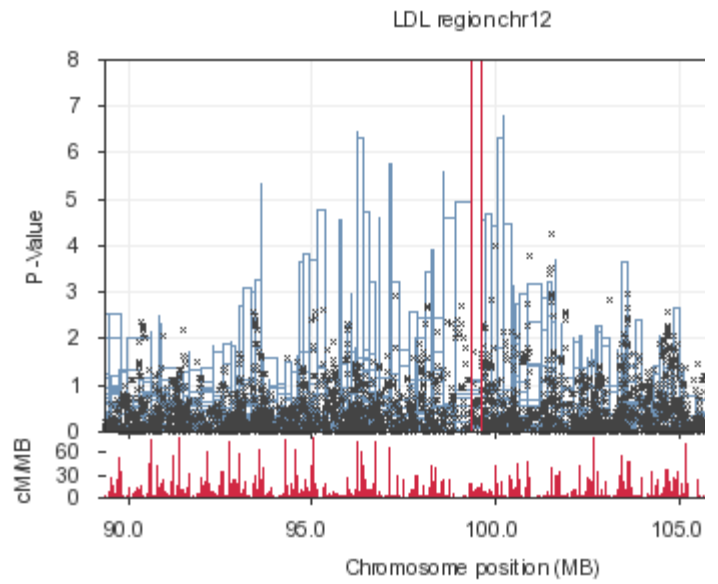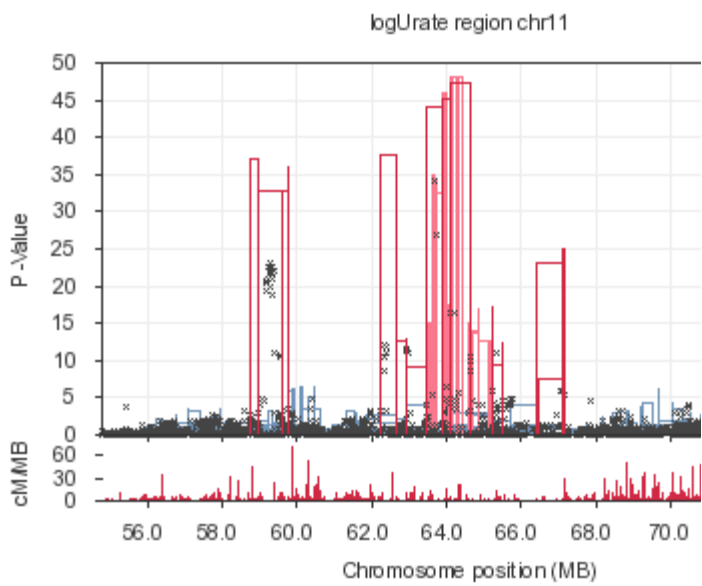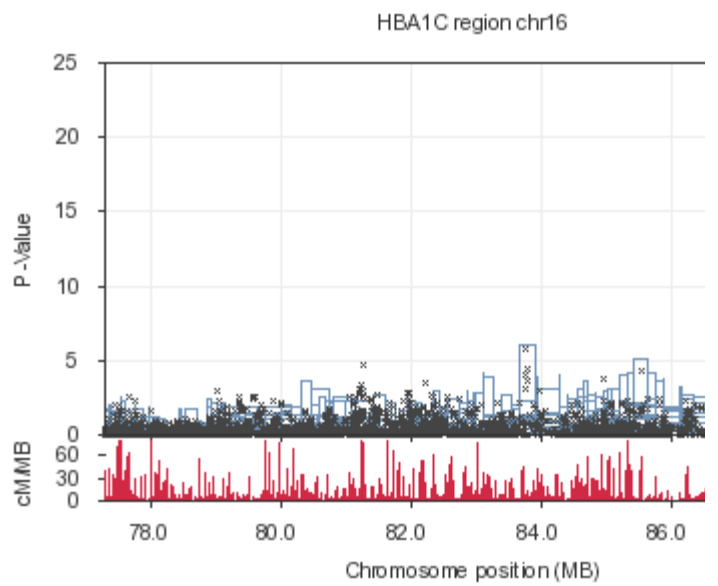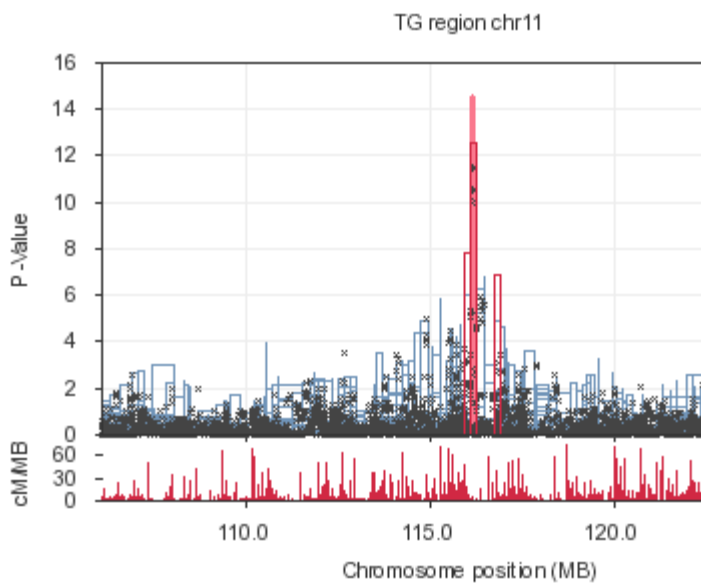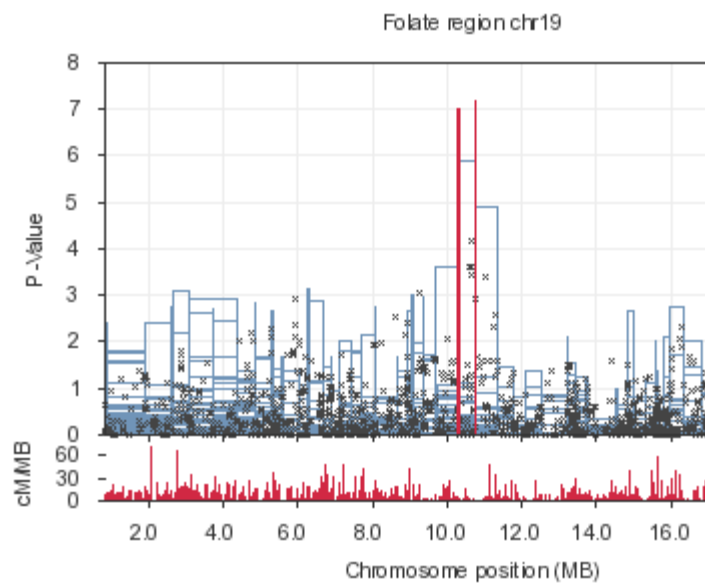

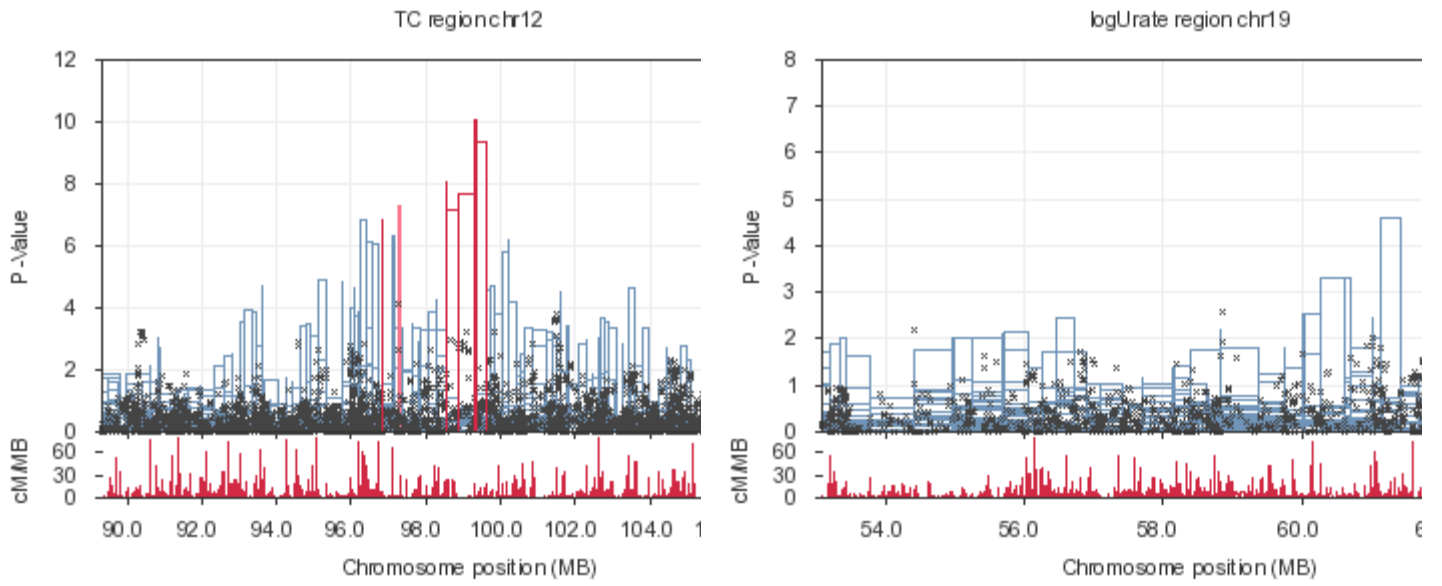

**Figure S7. Regions Showing Strong Evidence of Association in Isolate Cohort**

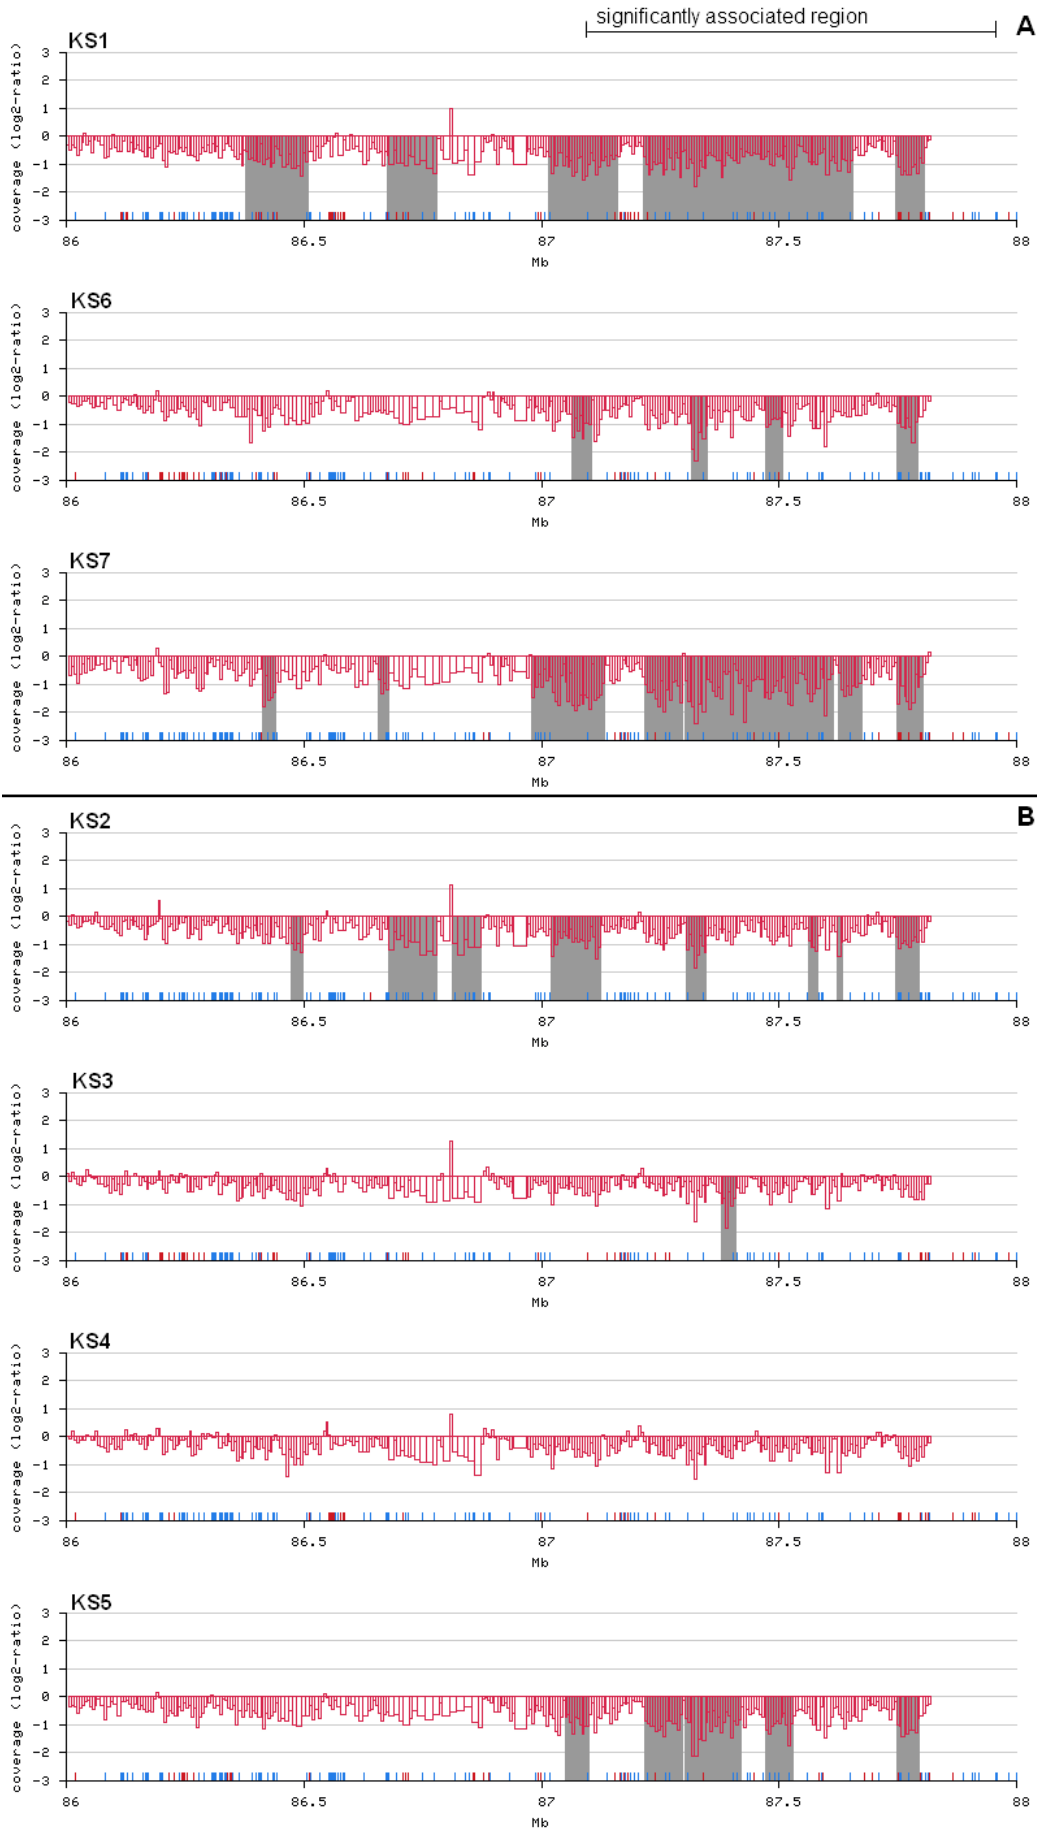

**Figure S8. Sequencing Coverage and Detected Copy Loss at Locus of haplotype Association to HBA1c**

CNV calling in carriers (**A**) and non-carriers (**B**) of haplotype association on chromosome 16 to Hemoglobin A1c. Red blocks represent window-normalized log<sub>2</sub> ratio of coverage; grey regions represent HMM-based heterozygous deletion calls (no other CNVs were present in the region); points along the X-axis correspond to genotyped SNP calls as homozygous (blue) or heterozygous (red).

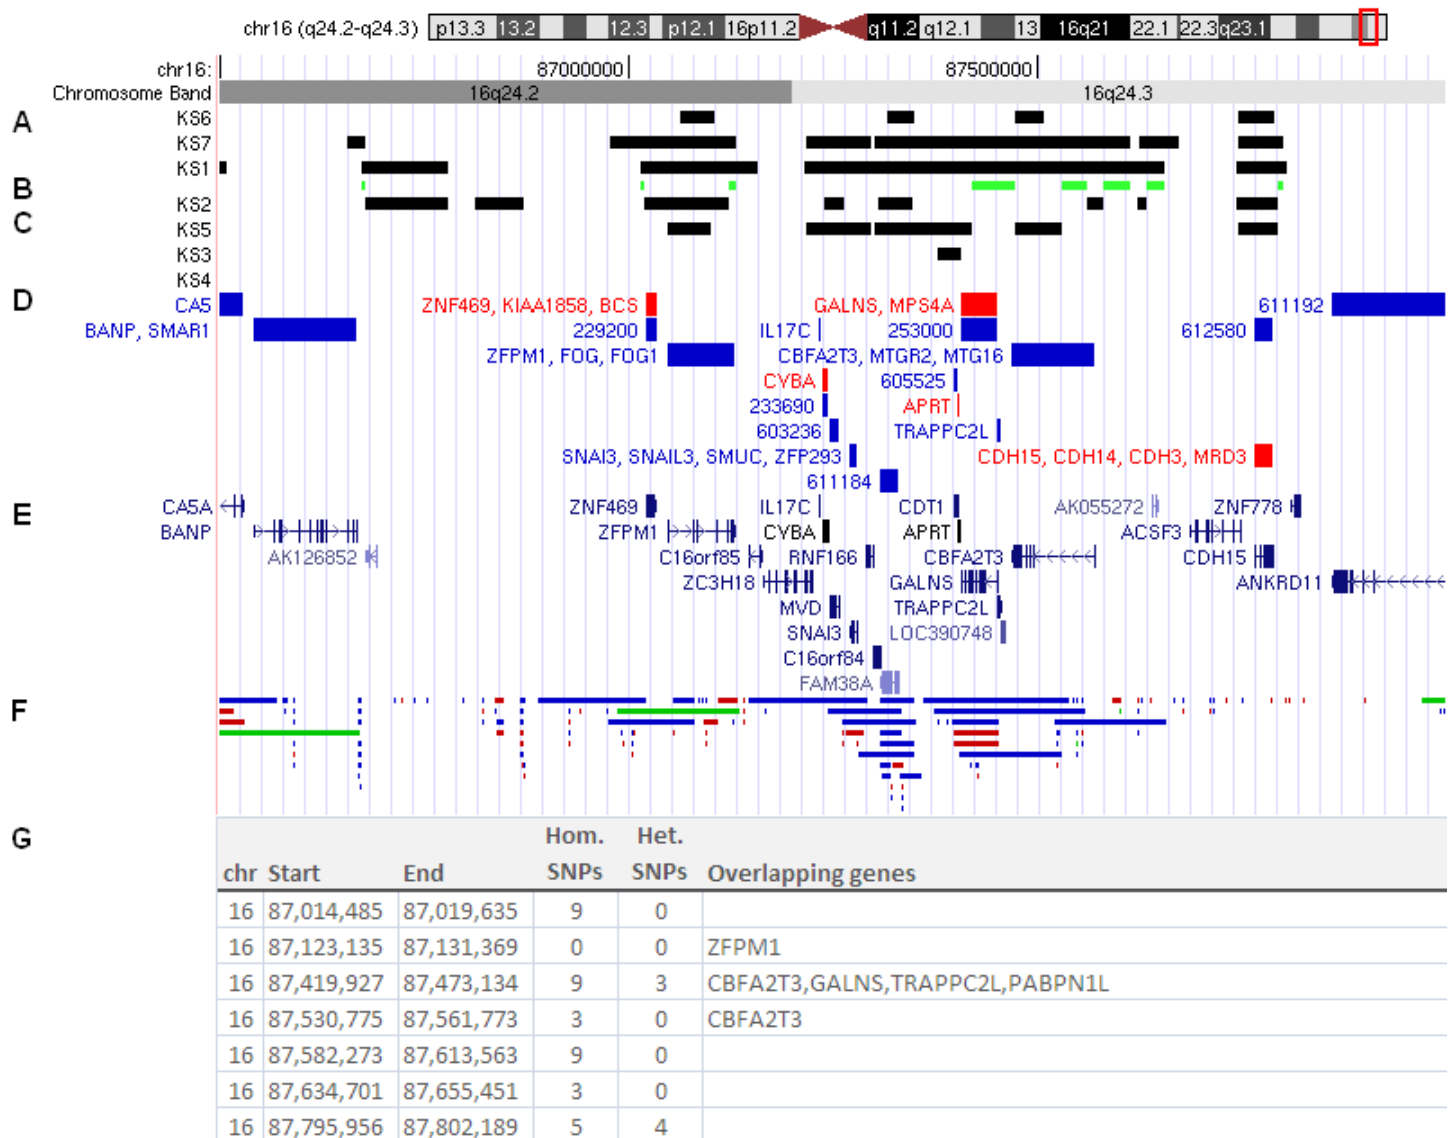

**Figure S9. Detected CNV Regions and Carrier-Specific Sites at Locus of Haplotype Association to HBA1c**

Genome browser plot detailing structural variants in region of haplotype association to Hemoglobin A1c. Shown are (A) CNVs present in carriers; (B, green) CNV regions exclusively in carriers; (C) CNVs present in non-carriers; (D) OMIM genes, (E) UCSC known genes; and (F) known CNVs from the Database of Genomic Variants. Table in (G) details carrier exclusive regions, observed homozygosity in Affymetrix 500k SNPs and overlapping exons.
